# Supplementary material
Source: PubMed Central journal article supplement (PMC4804749)
Supplement: ic5b02794_si_001.pdf [file ic5b02794_si_001.pdf]

## Supporting information

### **Spectroscopic and Theoretical Study of Cu<sup>1</sup> Binding to His111 in the Human Prion Protein Fragment 106-115**

Trinidad Arcos-López,<sup>1</sup> Munzarin Qayyum,<sup>2</sup> Lina Rivillas-Acevedo,<sup>1</sup> Marco C. Miotto,<sup>4</sup>  
Rafael Grande-Aztatzi,<sup>1</sup> Claudio O. Fernández,<sup>4</sup> Britt Hedman,<sup>3</sup> Keith O. Hodgson,<sup>2,3</sup>  
Alberto Vela,<sup>1</sup> Edward I. Solomon,<sup>2,3,\*</sup> Liliana Quintanar<sup>1,\*</sup>

<sup>1</sup>*Departamento de Química, Cinvestav, México.*

<sup>2</sup>*Department of Chemistry, Stanford University, Stanford CA 94395, USA.* <sup>3</sup>*Stanford Synchrotron  
Radiation Lightsource, SLAC, Stanford University, Menlo Park, CA 94025, USA.*

<sup>4</sup>*Max Planck Laboratory for Structural Biology, Chemistry and Molecular Biophysics of Rosario  
(MPLbioR, UNR-MPIbpC) and Instituto de Investigaciones para el Descubrimiento de Fármacos  
de Rosario (IIDEFAR, UNR-CONICET), Universidad Nacional de Rosario, Ocampo y  
Esmeralda, S2002LRK Rosario, Argentina.*

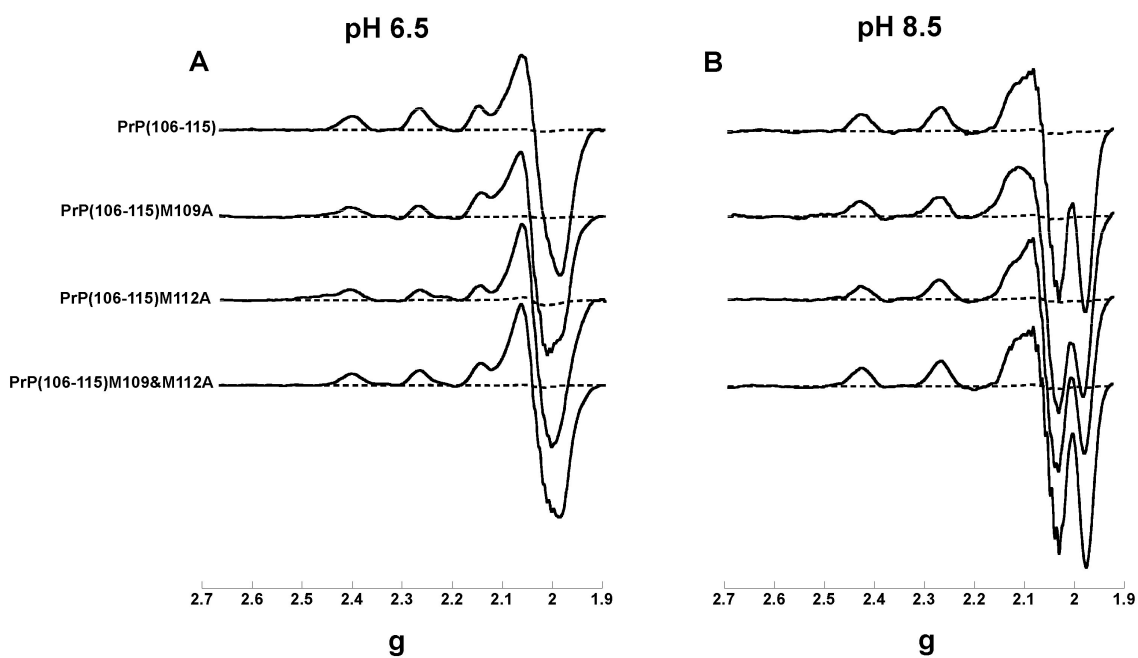

**Figure S1.** EPR spectra of the Cu(II)-peptide (solid lines) and after adding 100 Eq of ascorbic acid in anaerobic conditions (dashed lines) at pH 6.5 (A) and 8.5 (B). In all cases residual Cu(II) was less than 3 %.

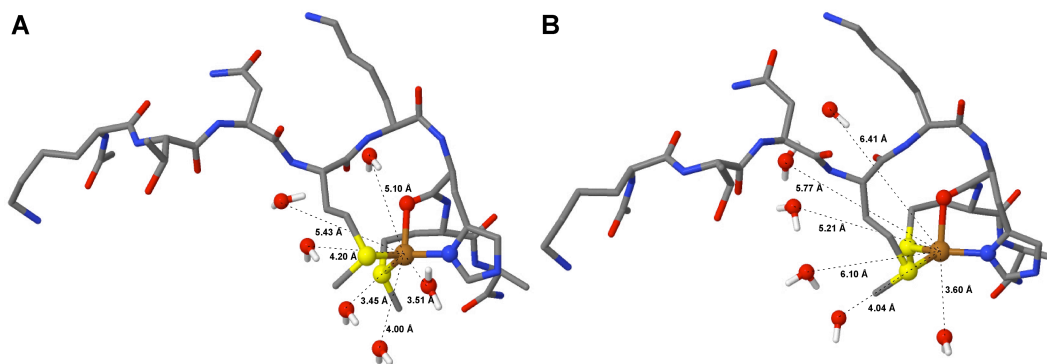

**Figure S2.** Representative distribution of explicit H<sub>2</sub>O molecules. In the 1N1O2Sa1 model at the beginning of optimization (A), water molecules are located between 3.5 and 5.5 Å. At the end of the optimization (B) with deMon2k, OPBE/TZVP/GEN-A2, water molecules are found around 3.5 and 6.5 Å. For clarity, most H atoms are not shown

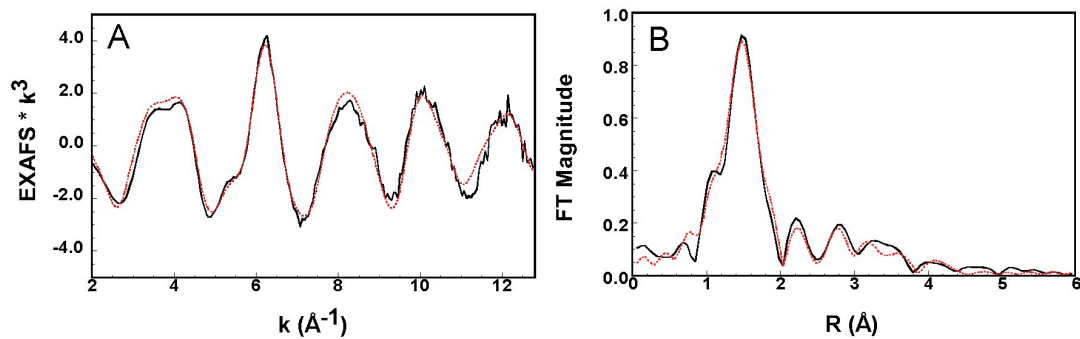

**Figure S3.** Representative EXAFS (A) and its Fourier transform (B) (solid black line) for Cu(II)-PrP(106-115) at pH 6.5. The best fit with parameters listed in Table 1, is shown in dotted red line.

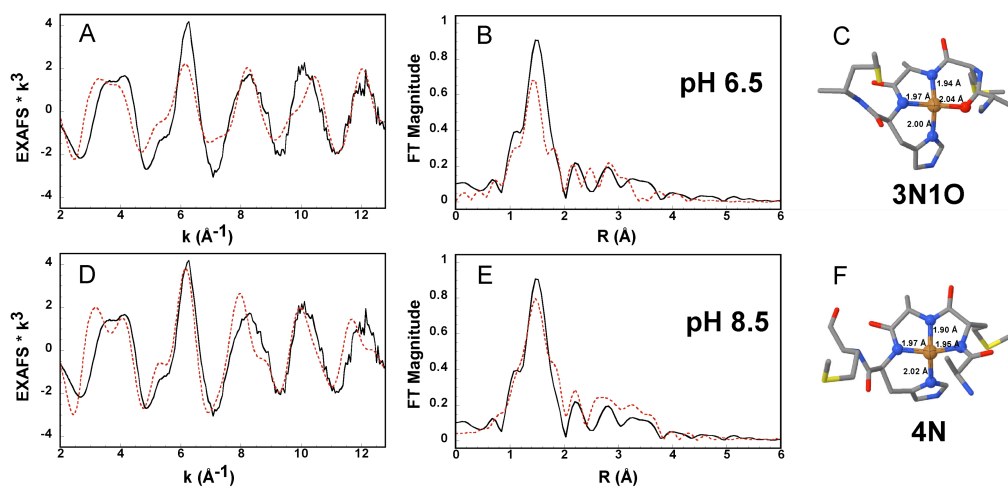

**Figure S4.** EXAFS data and Fourier transforms of Cu(II)-PrP(106-115) at pH 6.5 (A, B) and 8.5 (D, E) (solid black line) and their simulations (dashed red line) using reoptimized structures Cu(II)-3N1O (C) and Cu(II)-4N (F). The average of the bond distances between the four ligands is 1.99 and 1.96 Å in the 3N1O and 4N models, respectively.

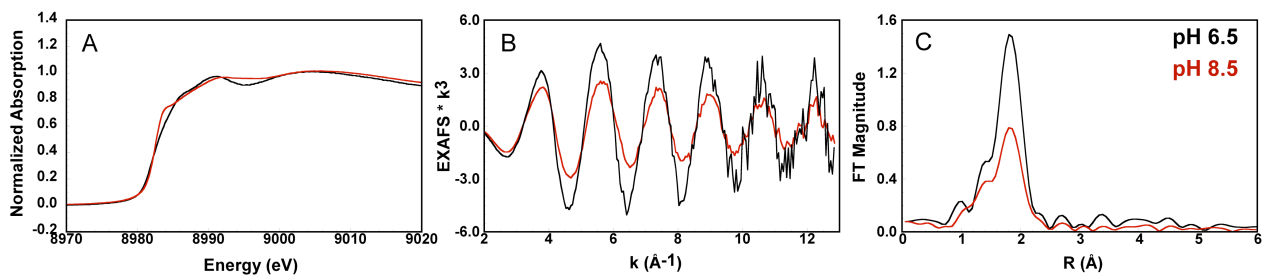

**Figure S5.** XANES (A), EXAFS (B) and Fourier transforms (C) of Cu(I)-PrP(106-115) at pH 6.5 (black line) and 8.5 (red line). At low pH, the spectrum exhibits a higher EXAFS data intensity as compared to that for pH 8.5.

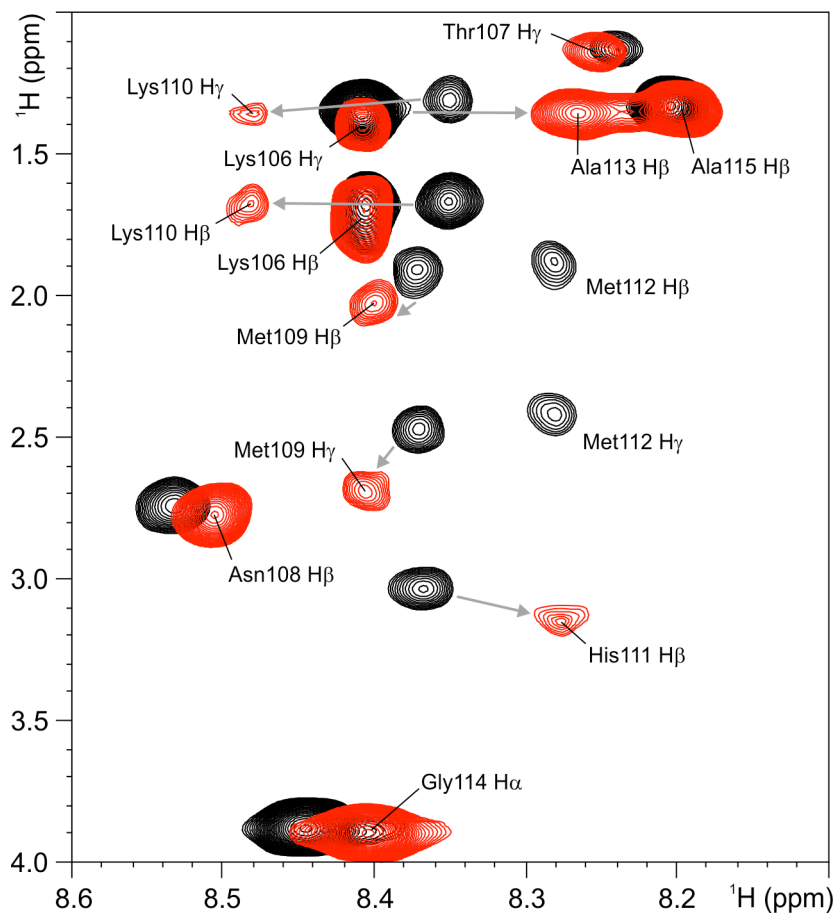

**Figure S6.** TOCSY  $^1\text{H}$ - $^1\text{H}$  of PrP(106-115) (black) and Cu(I)-PrP(106-115) (red) at pH 6.5. The most affected signals, in the presence of Cu(I), are those corresponding to Met109, Met112, His111 and Lys110.

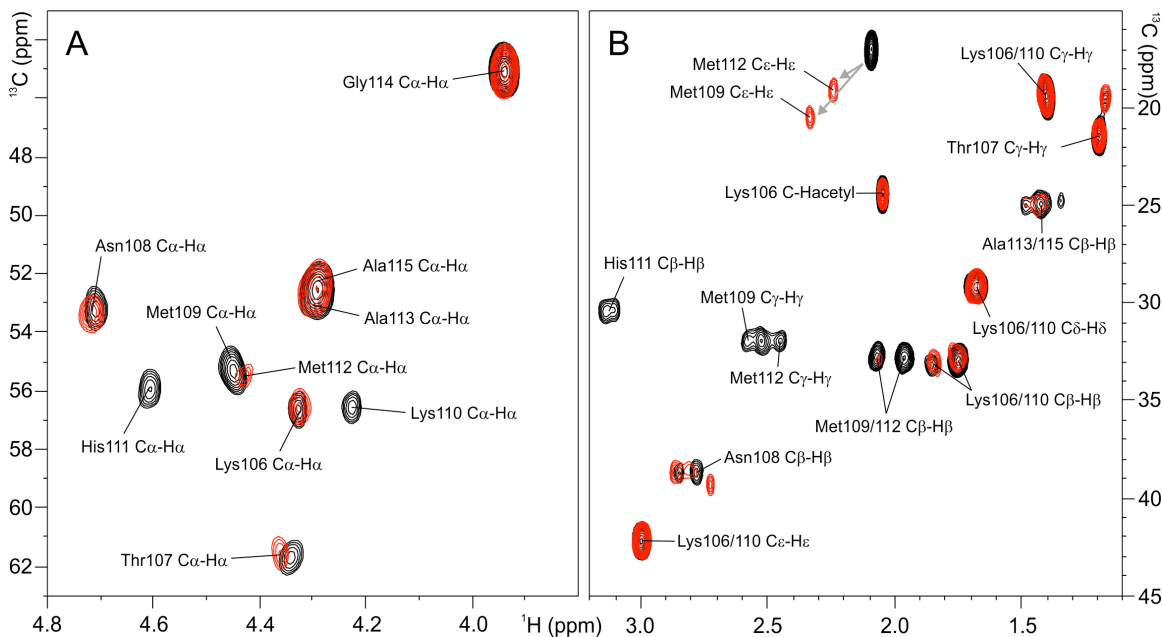

**Figure S7.** HSQC  $^1\text{H}$ - $^{13}\text{C}$  of PrP(106-115) (black) and Cu(I)-PrP(106-115) (red) at pH 6.5.  $\text{C}\alpha$  (A),  $\text{C}\beta$ ,  $\text{C}\gamma$ ,  $\text{C}\delta$  and  $\text{C}\epsilon$  (B). The most affected  $\text{C}\alpha$  signals correspond to His111 and Lys110, while the most affected  $\text{C}\beta$ ,  $\text{C}\gamma$ ,  $\text{C}\delta$  and  $\text{C}\epsilon$  correspond to His111, Met109 and Met112.



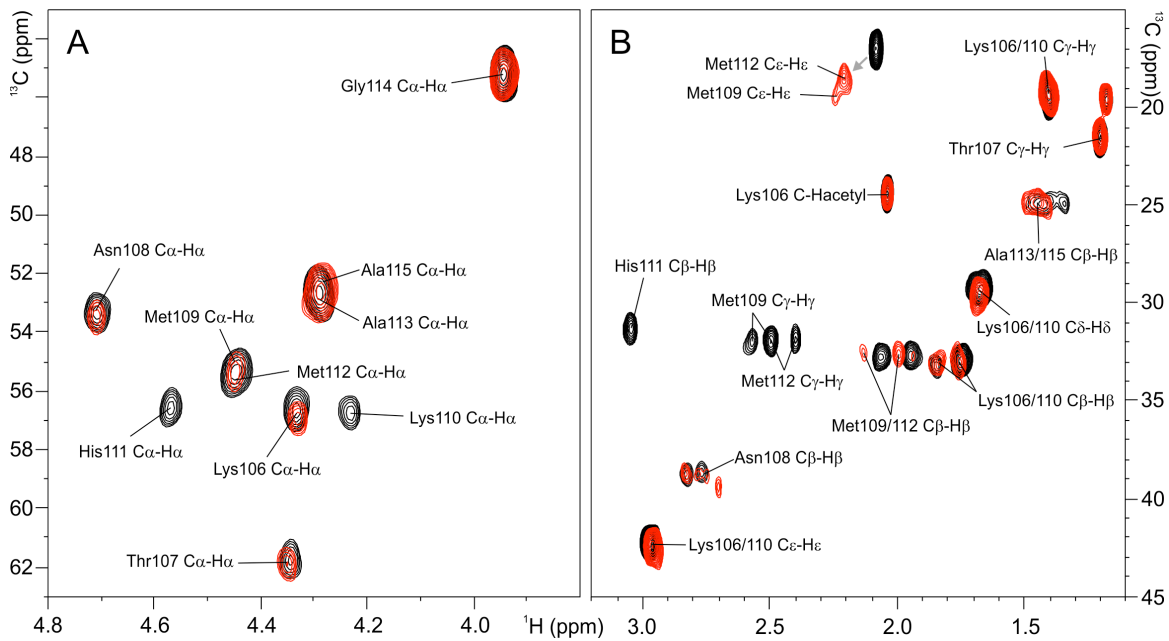

**Figure S8.** HSQC  $^1\text{H}$ - $^{13}\text{C}$  of PrP(106-115) (black) and Cu(I)-PrP(106-115) (red) at pH 8.5.  $\text{C}\alpha$  (A),  $\text{C}\beta$ ,  $\text{C}\gamma$ ,  $\text{C}\delta$  and  $\text{C}\epsilon$  (B). The most affected  $\text{C}\alpha$  signals correspond to His111 and Lys110, while the most affected  $\text{C}\beta$ ,  $\text{C}\gamma$ ,  $\text{C}\delta$  and  $\text{C}\epsilon$  correspond to His111, Met109 and Met112.

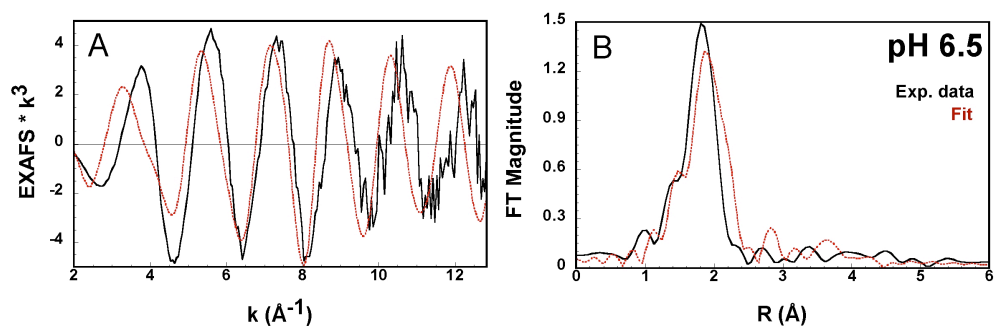

**Figure S9.** EXAFS (A) and Fourier transform (B) of Cu(I)-PrP(106-115) at pH 6.5 (solid black line) and the corresponding simulation (dashed red line) using the optimized structure 1N1O2Sc1, as listed in Table S2.

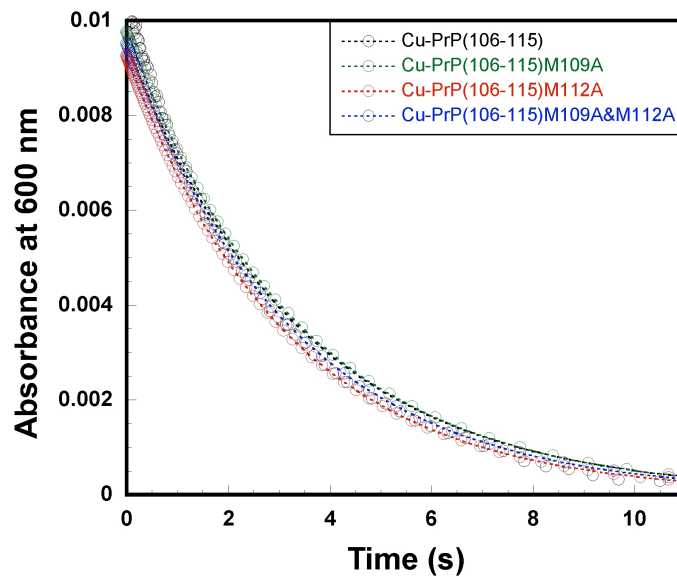

**Figure S10.** Stopped-flow absorption data and their fits of reduction of Cu(II)-PrP(106-115), (black) Cu(II)-PrP(106-115)M109A, (green) Cu(II)-PrP(106-115)M112A, (red) and Cu(II)-PrP(106-115)M109&M112A (blue) complexes at pH 6.5 with 20 equiv. of ascorbate.

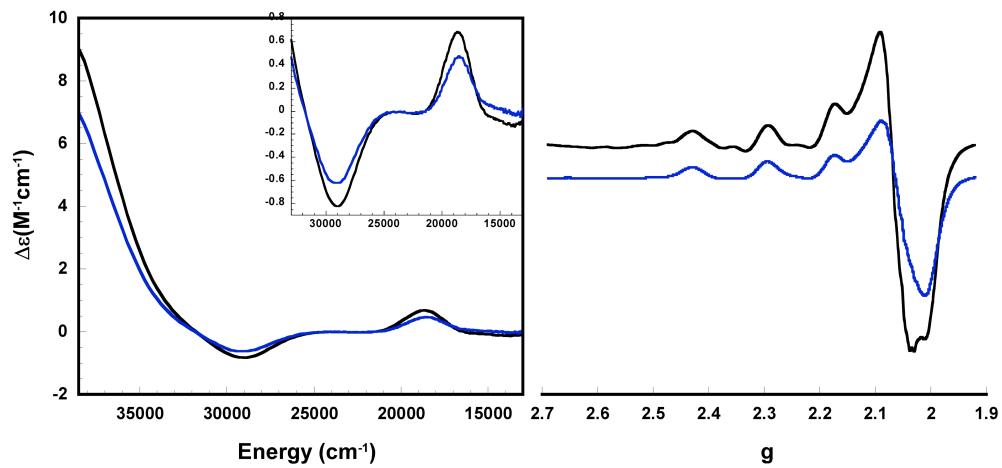

**Figure S11.** Representative CD and EPR spectra of Cu(II)-PrP(106-115) (black line) and in the end point of reoxidation kinetics (blue line), the signals associated with the Cu(II)-3N1O complex are recovered after reoxidation.

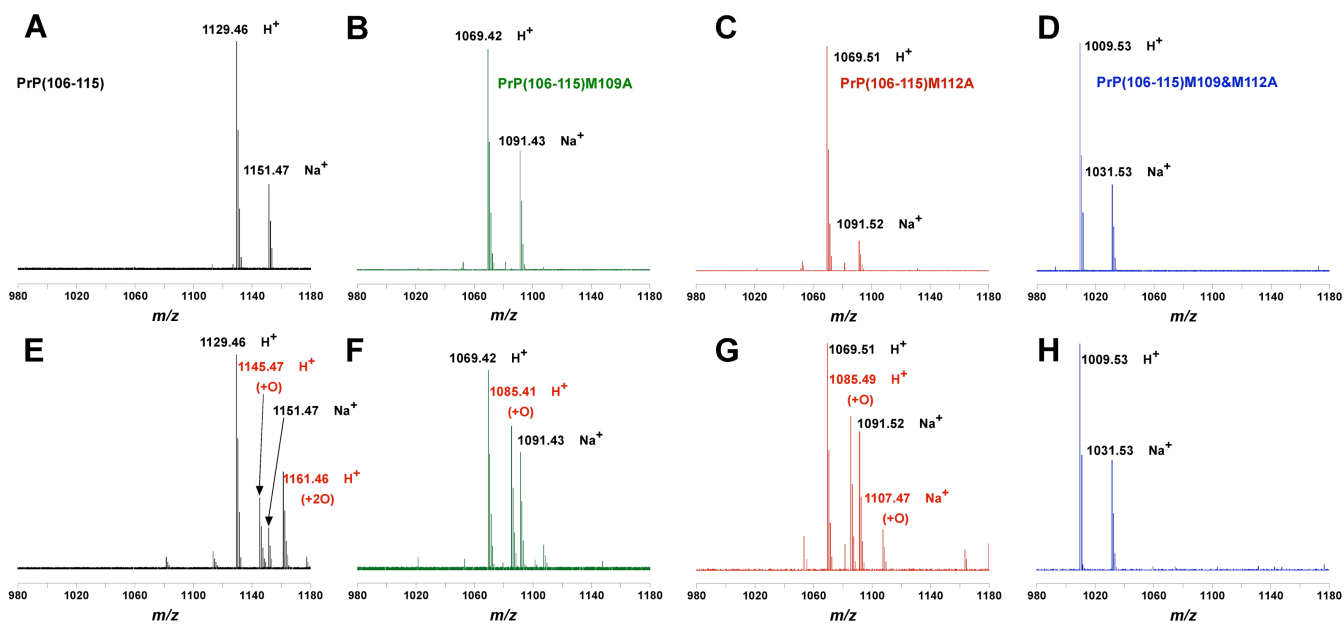

**Figure S12.** MALDI-TOF/TOF analysis of the PrP(106-115) (black), PrP(106-115)M109A (green), PrP(106-115)M112A (red) and PrP(106-115)M109&M112A (blue) peptides, before (A, B, C, D) and after a redox cycle with ascorbate and oxygen (E, F, G, H).

**Table S1.** Lowest Harmonic Frequencies of the Selected Optimized Cu(I)-PrP(106-115)

Structures with the OPBE Functional.

| <b>Models</b>           | <b>Frequency<br/>cm<sup>-1</sup></b> |
|-------------------------|--------------------------------------|
| 3N1O                    | 2.1                                  |
| 4N                      | 9.3                                  |
| 1N1O2Sa                 | 11.5                                 |
| 2N1O1S <sub>M109a</sub> | 6.8                                  |
| 2N1O1S <sub>M112a</sub> | 7.6                                  |

**Table S2.** Copper-ligand Distances (Å) for Selected Geometry-Optimized Models for the Cu(I)-PrP(106-115) Complexes: Effects of Implicit and Explicit Solvation.

| Model            |                         | Without Solvation | Implicit Solvation (ORCA) | Explicit Solvation (4 H <sub>2</sub> O) | Explicit Solvation (6 H <sub>2</sub> O) |
|------------------|-------------------------|-------------------|---------------------------|-----------------------------------------|-----------------------------------------|
| Models at pH 6.5 | 1N1O2Sa                 | 2S – 2.300        | 2S – 2.345                | 2S – 2.340                              | 2S – 2.350                              |
|                  |                         | 1N1O – 2.140      | 1N1O – 2.120              | 1N1O – 2.160                            | 1N1O – 2.170                            |
|                  | 1N1O2Sc1                | 2S – 2.340        | 2S – 2.365                | 2S – 2.345                              | 2S – 2.360                              |
|                  |                         | 1N1O – 2.155      | 1N1O – 2.170              | 1N1O – 2.145                            | 1N1O – 2.160                            |
| Models at pH 8.5 | 2N1O1S <sub>M109a</sub> | 1S – 2.280        | 1S – 2.300                | 1S – 2.310                              | 1S – 2.320                              |
|                  |                         | 1N – 2.020        | 1N – 2.030                | 1N – 2.020                              | 1N – 2.020                              |
|                  |                         | 1N1O – 2.200      | 1N1O – 2.180              | 1N1O – 2.180                            | 1N1O – 2.150                            |
|                  | 2N1O1S <sub>M112a</sub> | 1S – 2.360        | 1S – 2.420                | 1S – 2.350                              | 1S – 2.340                              |
|                  |                         | 1N – 2.010        | 1N – 2.010                | 1N – 2.000                              | 1N – 2.000                              |
|                  |                         | 1N1O – 2.140      | 1N1O – 2.200              | 1N1O – 2.180                            | 1N1O – 2.170                            |

**Table S3.** Initial Models of the Coordination of Cu(I)-PrP(106-113) at pH 6.5 and 8.5. In Group 1 the Ligands Include His111 Imidazole Nitrogen, Sulfur Atoms from Met109 and Met112, in the Groups 2 and 3 the Ligands Include His111 Imidazole Nitrogen and Only one Sulfur Atom from Either Met109 or Met112, Respectively. <sup>+</sup>, <sup>#</sup>, <sup>\*</sup>

| Group 1   |                                | Group 2A                  |                                |                                | Group 2B                  |                                |                                |
|-----------|--------------------------------|---------------------------|--------------------------------|--------------------------------|---------------------------|--------------------------------|--------------------------------|
| Model     | Fourth Ligand                  | Model                     | Third Ligand                   | Fourth Ligand                  | Model                     | Third Ligand                   | Fourth Ligand                  |
| 2N2Sa*    | N <sup>-</sup> <sub>H111</sub> | 3N1S <sub>M109a</sub> *   | N <sup>-</sup> <sub>H111</sub> | N <sup>-</sup> <sub>K110</sub> | 3N1S <sub>M112a</sub> *   | N <sup>-</sup> <sub>H111</sub> | N <sup>-</sup> <sub>K110</sub> |
| 2N2Sb*    | N <sup>-</sup> <sub>K110</sub> | 3N1S <sub>M109b</sub>     | N <sup>-</sup> <sub>H111</sub> | N <sup>-</sup> <sub>M109</sub> | 3N1S <sub>M112b</sub>     | N <sup>-</sup> <sub>H111</sub> | N <sup>-</sup> <sub>M109</sub> |
| 2N2Sa1    | N <sub>H111</sub>              | 3N1S <sub>M109c</sub> *   | N <sup>-</sup> <sub>K110</sub> | N <sup>-</sup> <sub>M109</sub> | 3N1S <sub>M112c</sub> *   | N <sup>-</sup> <sub>K110</sub> | N <sup>-</sup> <sub>M109</sub> |
| 2N2Sb1    | N <sub>K110</sub>              | 3N1S <sub>M109a1</sub>    | N <sub>H111</sub>              | N <sup>-</sup> <sub>K110</sub> | 3N1S <sub>M112a1</sub>    | N <sub>H111</sub>              | N <sup>-</sup> <sub>K110</sub> |
| 1N1O2Sa*  | O <sub>H111</sub>              | 3N1S <sub>M109a2</sub>    | N <sup>-</sup> <sub>H111</sub> | N <sub>K110</sub>              | 3N1S <sub>M112a2</sub>    | N <sup>-</sup> <sub>H111</sub> | N <sub>K110</sub>              |
| 1N1O2Sb*  | O <sub>K110</sub>              | 3N1S <sub>M109a3</sub>    | N <sub>H111</sub>              | N <sub>K110</sub>              | 3N1S <sub>M112a3</sub>    | N <sub>H111</sub>              | N <sub>K110</sub>              |
| 1N1O2Sc   | O <sub>N108</sub>              | 3N1S <sub>M109b1</sub>    | N <sub>H111</sub>              | N <sup>-</sup> <sub>M109</sub> | 3N1S <sub>M112c1</sub>    | N <sub>K110</sub>              | N <sup>-</sup> <sub>M109</sub> |
| 1N1O2Sa1  | O <sub>w/H111</sub>            | 3N1S <sub>M109b2</sub>    | N <sup>-</sup> <sub>H111</sub> | N <sub>M109</sub>              | 3N1S <sub>M112c2</sub>    | N <sup>-</sup> <sub>K110</sub> | N <sub>M109</sub>              |
| 1N1O2Sb1  | O <sub>w/K110</sub>            | 3N1S <sub>M109b3</sub>    | N <sub>H111</sub>              | N <sub>M109</sub>              | 3N1S <sub>M112c3</sub>    | N <sub>K110</sub>              | N <sub>M109</sub>              |
| 1N1O2Sc1* | O <sub>w/N108</sub>            | 3N1S <sub>M109c1</sub>    | N <sub>K110</sub>              | N <sup>-</sup> <sub>M109</sub> | 2N1O1S <sub>M112a</sub> * | N <sup>-</sup> <sub>K110</sub> | O <sub>H111</sub>              |
|           |                                | 3N1S <sub>M109c2</sub>    | N <sup>-</sup> <sub>K110</sub> | N <sub>M109</sub>              | 2N1O1S <sub>M112a1</sub>  | N <sub>K110</sub>              | O <sub>H111</sub>              |
|           |                                | 3N1S <sub>M109c3</sub>    | N <sub>K110</sub>              | N <sub>M109</sub>              | 2N1O1S <sub>M112b</sub>   | N <sup>-</sup> <sub>H111</sub> | O <sub>M109</sub>              |
|           |                                | 2N1O1S <sub>M109a</sub> * | N <sup>-</sup> <sub>K110</sub> | O <sub>H111</sub>              | 2N1O1S <sub>M112c</sub>   | N <sup>-</sup> <sub>M109</sub> | O <sub>H111</sub>              |
|           |                                | 2N1O1S <sub>M109a1</sub>  | N <sub>K110</sub>              | O <sub>H111</sub>              | 2N1O1S <sub>M112c1</sub>  | N <sub>M109</sub>              | O <sub>H111</sub>              |
|           |                                | 2N1O1S <sub>M109b</sub> * | N <sup>-</sup> <sub>H111</sub> | O <sub>M109</sub>              | 2N1O1S <sub>M112d</sub> * | N <sup>-</sup> <sub>M109</sub> | O <sub>K110</sub>              |
|           |                                | 2N1O1S <sub>M109c</sub> * | N <sup>-</sup> <sub>A113</sub> | O <sub>A113</sub>              | 2N1O1S <sub>M112d1</sub>  | N <sup>-</sup> <sub>M109</sub> | O <sub>w/K110</sub>            |
|           |                                | 2N1O1S <sub>M109a2</sub>  | N <sup>-</sup> <sub>K110</sub> | O <sub>w/H111</sub>            | 2N1O1S <sub>M112a2</sub>  | N <sup>-</sup> <sub>K110</sub> | O <sub>w/H111</sub>            |
|           |                                | 1N2O1S <sub>M109a</sub>   | O <sub>K110</sub>              | O <sub>H111</sub>              | 1N2O1S <sub>M112a</sub>   | O <sub>H111</sub>              | O <sub>M109</sub>              |
|           |                                |                           |                                |                                | 1N2O1S <sub>M112b</sub>   | O <sub>H111</sub>              | O <sub>K110</sub>              |
|           |                                |                           |                                |                                | 1N2O1S <sub>M112c</sub>   | O <sub>M109</sub>              | O <sub>K110</sub>              |

<sup>+</sup> In the table

N<sup>-</sup> is nitrogen belonging to deprotonated amide of backbone

N is nitrogen belonging to protonated amide of backbone

O is oxygen belonging to the carbonyl of backbone

O<sub>w</sub> is oxygen belonging to a H<sub>2</sub>O molecule

<sup>#</sup> Models with O<sub>w</sub>, oxygen atom belonging to the carbonyl of backbone were replaced in the same place for an oxygen atom belonging to a water molecule.

<sup>\*</sup> After optimization, only these models retain their tetracoordinated structure.



**Table S4.** Structural and Energetic Parameters of the Optimized Models in Group 1. (OPBE/TZVP, With and Without 6 Explicit Water Molecules). \*  $\Delta E$  is the Relative Energy in kcal/mol. Experimental EXAFS Bond Distances at pH 6.5 for 2 Cu-S and 2 Cu-N/O are 2.37 and 2.17 Å, Respectively, (Table 2).

| Model    | Ligands                        | Average BD (OPBE) | Average BD (Explicit Solvation, 6 H <sub>2</sub> O) | $\Delta E$ (Explicit Solvation) |
|----------|--------------------------------|-------------------|-----------------------------------------------------|---------------------------------|
| 2N2Sb    | S <sub>M109</sub>              |                   |                                                     |                                 |
|          | S <sub>M112</sub>              | Cu-2S 2.34        | Cu-2S 2.36                                          | 0.00                            |
|          | N <sub>Im</sub>                | Cu-2N 2.09        | Cu-2N 2.09                                          |                                 |
|          | N <sub>K110</sub> <sup>-</sup> |                   |                                                     |                                 |
| <hr/>    |                                |                   |                                                     |                                 |
| 2N2Sa    | S <sub>M109</sub>              |                   |                                                     |                                 |
|          | S <sub>M112</sub>              | Cu-2S 2.32        | Cu-2S 2.34                                          | 8.41                            |
|          | N <sub>Im</sub>                | Cu-2N 2.10        | Cu-2N 2.10                                          |                                 |
|          | N <sub>H111</sub> <sup>-</sup> |                   |                                                     |                                 |
| <hr/>    |                                |                   |                                                     |                                 |
| 1N1O2Sa  | S <sub>M109</sub>              |                   |                                                     |                                 |
|          | S <sub>M112</sub>              | Cu-2S 2.30        | Cu-2S 2.35                                          | 0.00                            |
|          | N <sub>Im</sub>                | Cu-1N1O 2.14      | Cu-1N1O 2.17                                        |                                 |
|          | O <sub>H111</sub>              |                   |                                                     |                                 |
| <hr/>    |                                |                   |                                                     |                                 |
| 1N1O2Sc1 | S <sub>M109</sub>              |                   |                                                     |                                 |
|          | S <sub>M112</sub>              | Cu-2S 2.34        | Cu-2S 2.36                                          | 4.20                            |
|          | N <sub>Im</sub>                | Cu-1N1O 2.15      | Cu-1N1O 2.16                                        |                                 |
|          | O <sub>w</sub>                 |                   |                                                     |                                 |
| <hr/>    |                                |                   |                                                     |                                 |
| 1N1O2Sb  | S <sub>M109</sub>              |                   |                                                     |                                 |
|          | S <sub>M112</sub>              | Cu-2S 2.32        | Cu-2S 2.34                                          | 13.32                           |
|          | N <sub>Im</sub>                | Cu-1N1O 2.16      | Cu-1N1O 2.14                                        |                                 |
|          | O <sub>K110</sub>              |                   |                                                     |                                 |
| <hr/>    |                                |                   |                                                     |                                 |

\* In the table

N<sup>-</sup> is nitrogen belonging to deprotonated amide of backbone

N<sub>Im</sub> is nitrogen belonging to imidazol of His111

O is oxygen belonging to the carbonyl of backbone

O<sub>w</sub> is oxygen belonging to a H<sub>2</sub>O molecule

**Table S5.** Structural and Energetic Parameters of the Optimized Geometries for the Group 2A. (OPBE/TZVP, With and Without 6 Explicit Water Molecules). \*  $\Delta E$  is the Relative Energy in kcal/mol. Experimental EXAFS Bond Distances at pH 8.5 for 1 Cu-S, 1 Cu-N/O and 2 Cu-N/O are 2.35, 1.97 and 2.15 Å, Respectively, (Table 2).

|                                | Model                          | Ligands                        | Average BD in OPBE |         | Average BD (Explicit Solvation, 6 H <sub>2</sub> O) |       | $\Delta E$ (Explicit Solvation) |
|--------------------------------|--------------------------------|--------------------------------|--------------------|---------|-----------------------------------------------------|-------|---------------------------------|
| Bond (Å)                       | 3N1S <sub>M109a</sub>          | S <sub>M109</sub>              | Cu-1S              | 2.27    | Cu-1S                                               | 2.28  | 0.00                            |
|                                |                                | N <sub>Im</sub>                | Cu-1N              | 2.04    |                                                     |       |                                 |
|                                |                                | N <sup>-</sup> <sub>H111</sub> | Cu-2N              | 2.10    | Cu-3N                                               | 2.10  |                                 |
|                                |                                | N <sup>-</sup> <sub>K110</sub> |                    |         |                                                     |       |                                 |
|                                | 3N1S <sub>M109c</sub>          | S <sub>M109</sub>              | Cu-1S              | 2.31    | Cu-1S                                               | 2.36  | 14.67                           |
|                                |                                | N <sub>Im</sub>                | Cu-1N              | 2.04    | Cu-1N                                               | 2.04  |                                 |
|                                |                                | N <sup>-</sup> <sub>K110</sub> | Cu-2N              | 2.15    | Cu-2N                                               | 2.13  |                                 |
|                                |                                | N <sup>-</sup> <sub>M109</sub> |                    |         |                                                     |       |                                 |
|                                | 2N1O1S <sub>M109a</sub>        | S <sub>M109</sub>              | Cu-1S              | 2.28    | Cu-1S                                               | 2.32  | 0.00                            |
|                                |                                | N <sub>Im</sub>                | Cu-1N              | 2.02    | Cu-1N                                               | 2.02  |                                 |
| N <sup>-</sup> <sub>K110</sub> |                                | Cu-1N1O                        | 2.20               | Cu-1N1O | 2.15                                                |       |                                 |
| O <sub>H111</sub>              |                                |                                |                    |         |                                                     |       |                                 |
| 2N1O1S <sub>M109b</sub>        | S <sub>M109</sub>              | Cu-1S                          | 2.27               | Cu-1S   | 2.28                                                | 9.45  |                                 |
|                                | N <sub>Im</sub>                | Cu-1O                          | 2.36               | Cu-1O   | 2.45                                                |       |                                 |
|                                | N <sup>-</sup> <sub>H111</sub> | Cu-2N                          | 2.02               | Cu-2N   | 2.03                                                |       |                                 |
|                                | O <sub>M109</sub>              |                                |                    |         |                                                     |       |                                 |
| 2N1O1S <sub>M109c</sub>        | S <sub>M109</sub>              | Cu-1S                          | 2.22               | Cu-1S   | 2.30                                                | 11.28 |                                 |
|                                | N <sub>Im</sub>                | Cu-1O                          | 2.30               | Cu-1O   | 2.43                                                |       |                                 |
|                                | N <sup>-</sup> <sub>A113</sub> | Cu-2N                          | 2.01               | Cu-2N   | 2.04                                                |       |                                 |
|                                | O <sub>A113</sub>              |                                |                    |         |                                                     |       |                                 |

\* In the table

N<sup>-</sup> is nitrogen belonging to deprotonated amide of backbone

N<sub>Im</sub> is nitrogen belonging to imidazol of His111

O is oxygen belonging to the carbonyl of backbone

**Table S6.** Structural and Energetic Parameters of the Optimized Geometries for the Group 2B. (OPBE/TZVP, With and Without 6 Explicit Water Molecules). \*  $\Delta E$  is the Relative Energy in kcal/mol. Experimental EXAFS Bond Distances at pH 8.5 for 1 Cu-S, 1 Cu-N/O and 2 Cu-N/O are 2.35, 1.97 and 2.15 Å, Respectively, (Table 2).\*

| Bond (Å)                | Model                 | Ligands                        | Average BD in OPBE |       | Average BD (Explicit Solvation, 6 H <sub>2</sub> O) |       | $\Delta E$ (Explicit Solvation) |
|-------------------------|-----------------------|--------------------------------|--------------------|-------|-----------------------------------------------------|-------|---------------------------------|
|                         | 3N1S <sub>M112a</sub> |                                | S <sub>M112</sub>  | Cu-1S | 2.30                                                | Cu-1S | 2.28                            |
|                         |                       | N <sub>Im</sub>                |                    |       |                                                     |       |                                 |
|                         |                       | N <sup>-</sup> <sub>H111</sub> | Cu-3N              | 2.04  | Cu-3N                                               | 2.03  |                                 |
|                         |                       | N <sup>-</sup> <sub>K110</sub> |                    |       |                                                     |       |                                 |
| 3N1S <sub>M112c</sub>   |                       | S <sub>M112</sub>              | Cu-1S              | 2.29  | Cu-1S                                               | 2.30  | 6.63                            |
|                         |                       | N <sub>Im</sub>                |                    |       |                                                     |       |                                 |
|                         |                       | N <sup>-</sup> <sub>K110</sub> | Cu-3N              | 2.06  | Cu-3N                                               | 2.04  |                                 |
|                         |                       | N <sup>-</sup> <sub>M109</sub> |                    |       |                                                     |       |                                 |
| 2N1O1S <sub>M112a</sub> |                       | S <sub>M112</sub>              | Cu-1S              | 2.36  | Cu-1S                                               | 2.34  | 0.00                            |
|                         |                       | N <sub>Im</sub>                | Cu-1N              | 2.01  | Cu-1N                                               | 2.00  |                                 |
|                         |                       | N <sup>-</sup> <sub>K110</sub> | Cu-1N1O            | 2.14  | Cu-1N1O                                             | 2.17  |                                 |
|                         |                       | O <sub>H111</sub>              |                    |       |                                                     |       |                                 |
| 2N1O1S <sub>M112d</sub> |                       | S <sub>M112</sub>              | Cu-1S              | 2.36  | Cu-1S                                               | 2.35  | 9.56                            |
|                         |                       | N <sub>Im</sub>                | Cu-1N              | 2.04  | Cu-1O                                               | 3.39  |                                 |
|                         |                       | N <sup>-</sup> <sub>M109</sub> | Cu-1N1O            | 2.20  | Cu-2N                                               | 2.02  |                                 |
|                         |                       | O <sub>K110</sub>              |                    |       |                                                     |       |                                 |

\* In the table

N<sup>-</sup> is nitrogen belonging to deprotonated amide of backbone

N<sub>Im</sub> is nitrogen belonging to imidazol of His111

O is oxygen belonging to the carbonyl of backbone

**Table S7.** Calculated Reorganization Energies ( $\lambda_i$ ) for the Pairs Cu(II)-3N1O/Cu(I)-1N1O2S and Cu(II)-4N/Cu(I)-2N1O1S Models at pH 6.5 and 8.5.

|        | ID                                         | Structure                      | Energy (a. u.) | $\lambda_i$ (a. u.) | $\lambda_i$ (eV) |
|--------|--------------------------------------------|--------------------------------|----------------|---------------------|------------------|
| pH 6.5 | $E_{\text{ox}}(\text{Red}_{\text{geom}})$  | Cu(II)-1N1O2Sa                 | -5941.968973   |                     |                  |
|        | $E_{\text{ox}}(\text{Ox}_{\text{geom}})$   | Cu(II)-3N1O                    | -5942.132491   | 0.065875            | 1.79             |
|        | $E_{\text{red}}(\text{Ox}_{\text{geom}})$  | Cu(I)-3N1O                     | -5942.271824   |                     |                  |
|        | $E_{\text{red}}(\text{Red}_{\text{geom}})$ | Cu(I)-1N1O2Sa                  | -5942.240056   |                     |                  |
|        | $E_{\text{ox}}(\text{Red}_{\text{geom}})$  | Cu(II)-1N1O2Sc1                | -5941.986104   |                     |                  |
|        | $E_{\text{ox}}(\text{Ox}_{\text{geom}})$   | Cu(II)-3N1O                    | -5942.132491   | 0.079190            | 2.15             |
|        | $E_{\text{red}}(\text{Ox}_{\text{geom}})$  | Cu(I)-3N1O                     | -5942.271824   |                     |                  |
|        | $E_{\text{red}}(\text{Red}_{\text{geom}})$ | Cu(I)-1N1O2Sc1                 | -5942.283818   |                     |                  |
| pH 8.5 | $E_{\text{ox}}(\text{Red}_{\text{geom}})$  | Cu(II)-2N1O1S <sub>M109a</sub> | -5941.661874   |                     |                  |
|        | $E_{\text{ox}}(\text{Ox}_{\text{geom}})$   | Cu(II)-4N                      | -5941.906563   | 0.058984            | 1.60             |
|        | $E_{\text{red}}(\text{Ox}_{\text{geom}})$  | Cu(I)-4N                       | -5942.015464   |                     |                  |
|        | $E_{\text{red}}(\text{Red}_{\text{geom}})$ | Cu(I)-2N1O1S <sub>M109a</sub>  | -5941.888744   |                     |                  |
|        | $E_{\text{ox}}(\text{Red}_{\text{geom}})$  | Cu(II)-2N1O1S <sub>M112a</sub> | -5941.587744   |                     |                  |
|        | $E_{\text{ox}}(\text{Ox}_{\text{geom}})$   | Cu(II)-4N                      | -5941.906563   | 0.061087            | 1.66             |
|        | $E_{\text{red}}(\text{Ox}_{\text{geom}})$  | Cu(I)-4N                       | -5942.015464   |                     |                  |
|        | $E_{\text{red}}(\text{Red}_{\text{geom}})$ | Cu(I)-2N1O1S <sub>M112a</sub>  | -5941.818821   |                     |                  |

**Estimation of  $E^\circ_{(\text{Cu(II/I)-PrP(106-115)})}$  at pH 6.5 and 8.5 by Reductive Titrations**

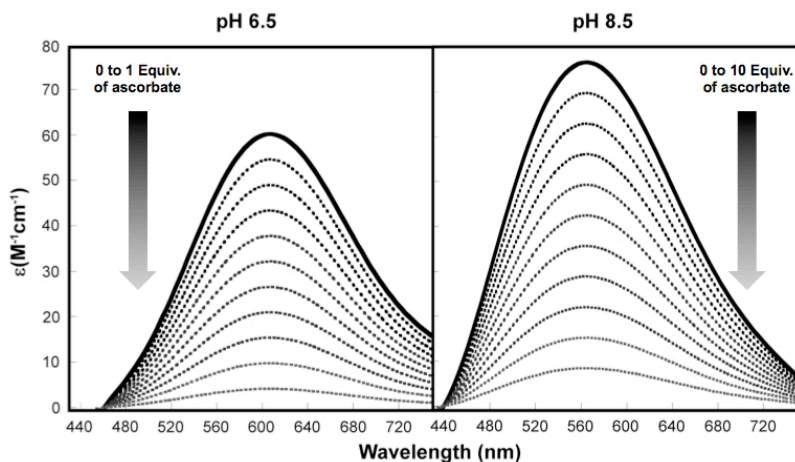

**Figure S13.** Representative anaerobic titration with ascorbate of the complex Cu(II)-PrP(106-115), followed by the loss in the d-d band (dotted lines). At pH 6.5 the titration was to 1 equiv. of ascorbate, whereas titration at pH 8.5 was to 10 equiv.

$E^\circ_{(\text{Cu(II/I)-PrP(106-115)})}$  value was estimated by  $\Delta G^\circ = -nF\Delta E^\circ$ , where  $\Delta E^\circ = E^\circ_{(\text{Cu(II/I)-PrP(106-115)})} - E^\circ_{(\text{AA/DA})}$ ,  $E^\circ_{(\text{AA/DA})} = 0.052$  V vs. NHE, and  $\Delta G^\circ = -RT \ln K_{eq}$ .

Considering:

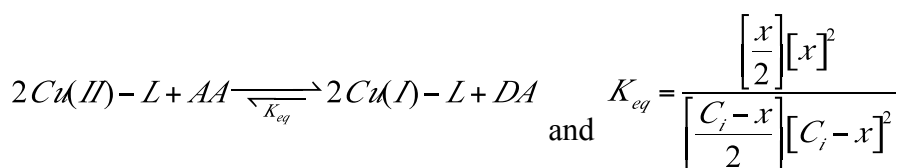

Where  $C_i$  is the [Cu(II)-L] at the starting point of the titration and  $x$  is the [Cu(I)-L] obtained by the percent of reduction in the titration followed by UV-Vis of Cu(II)-PrP(106-115) with 1 or 10 equiv. of ascorbate.

At pH 6.5  $\Delta G^\circ = -4.62$  kcal/mol  $\Delta E^\circ = 0.1002$  V and  $E^\circ_{(\text{Cu(II/I)-PrP(106-115)})} = 152$  mV.

At pH 8.5  $\Delta G^\circ = -1.09$  kcal/mol,  $\Delta E^\circ = 0.0238$  V and  $E^\circ_{(\text{Cu(II/I)-PrP(106-115)})} = 75.8$  mV.

$\Delta\Delta G^\circ = (\Delta G^\circ_{(3\text{N1O})} - \Delta G^\circ_{(4\text{N})}) = -3.52$  kcal/mol

### **Calculation of $k_{ET(3N1O)}/k_{ET(4N)}$ using Marcus Equation**

Assuming that the term  $H_{AB}$  is comparable for both reduction processes (i.e.

$H_{AB(3N1O)}^2 = H_{AB(4N)}^2$ ), the ratio of the reduction rates for the Cu(II)-3N1O and Cu(II)-4N

complexes take the form:

$$\frac{k_{ET(3N1O)}}{k_{ET(4N)}} = \frac{\lambda_{(4N)}^{\frac{1}{2}}}{\lambda_{(3N1O)}^{\frac{1}{2}}} e^{\frac{(\Delta G_{(4N)}^{\circ} + \lambda_{(4N)})^2}{4\lambda_{(4N)}k_B T} - \frac{(\Delta G_{(3N1O)}^{\circ} + \lambda_{(3N1O)})^2}{4\lambda_{(3N1O)}k_B T}}$$

Where:

$\lambda_{(3N1O)} = 1.79 eV$  and  $\lambda_{(4N)} = 1.6 eV$  are the calculated values for the reorganization energies (Table S7).

Using the value of  $\Delta G_{(3N1O)}^{\circ} = -4.62 kcal/mol$  and  $\Delta G_{(4N)}^{\circ} = -1.09 kcal/mol$ , which are derived from the reductive titration (vide supra), we obtain  $k_{ET(3N1O)}/k_{ET(4N)} = 2.3$ .

The ratio of experimental reduction rates for the Cu(II)-3N1O and Cu(II)-4N species is 2.14.

### ***Calculation of Outer-Sphere Electron Transfer Rate***

The rate of outer-sphere reduction of O<sub>2</sub> by Cu(I)-PrP(106-115) complexes was obtained as follows:

$$k_{et} = Ze^{\left(\frac{-\Delta G^\ddagger}{RT}\right)}$$

Where:

$$\Delta G^\ddagger = \left(\frac{\lambda}{4}\right)\left(\frac{\lambda + \Delta G^\circ}{\lambda}\right)^2$$

$$Z \text{ (frequency factor)} = 10^{11} \text{M}^{-1} \text{s}^{-1}$$

$$\lambda \text{ (total reorganization energy)} = (\lambda_{\text{Cu-PrP, donor}} + \lambda_{\text{O}_2, \text{acceptor}})/2 = 1.84 \text{ eV}$$

$$\lambda_{\text{O}_2, \text{acceptor}} = 1.89 \text{ eV (experimental value)}$$

$$\lambda_{\text{Cu-PrP, donor}} = 1.79 \text{ eV (calculated value for Cu(II)-3N1O and Cu(I)-1N1O2Sa in this work).}^*$$

$$\Delta G^\circ = -nF\Delta E^\circ = 0.31 \text{ eV}$$

$$\Delta E^\circ = -0.16 \text{ V (O}_2/\text{O}_2^-) - 0.152 \text{ V (Cu(I/II)-PrP(106-115))} = -0.31 \text{ V}$$

Using these values the second ET rate is estimated to be 3.79 M<sup>-1</sup>s<sup>-1</sup>, which, accounting for [O<sub>2</sub>] = 0.0741 mM results in a first order rate constant of 2.81x10<sup>-4</sup> s<sup>-1</sup>

\* If use the calculated  $\lambda$  value for the pair Cu(II)-3N1O/Cu(I)-1N1O2Sc1 (2.15 eV) the first order ET rate constant is estimated to be 4.49x10<sup>-5</sup>s<sup>-1</sup>

## Experimental Details

*Electron Paramagnetic Resonance (EPR) Spectroscopy.* Cu(II) and Cu(I) samples for EPR spectroscopy were acquired either using the same samples prepared to K-Edge X-Ray Absorption Measurements or the end point in the re-oxidation experiments. X-band EPR spectra were collected using a Bruker EMX spectrometer, ER 041 XG microwave bridge, and ER 4102ST cavity. The following conditions were used: microwave frequency, 9.4 GHz; temperature, 77 K; microwave power, 10 mW; modulation amplitude, 5 G; modulation frequency, 100 kHz; time constant, 327 ms; conversion time, 83 ms; and averaging over 12 scans. EPR spectra were baseline-corrected using KaleidaGraph 4.1.3.

*Circular Dichroism (CD) Spectroscopy.* CD spectra were recorded using a Jasco J-815 CD spectropolarimeter. Spectra were recorded in quartz cells with 1 cm path lengths at the end point of reoxidation experiments.

*Electronic Structure Calculations of reoptimized Cu(II) models.* In the calculations of the model 4N, reported models 4Na and 4Nb (Rivillas-Acevedo L. et al. Inorg. Chem 2011, 50, 1956-1972) were used, calculations were performed using the deMon2k code with the functional OPBE; TZVP and GEN-A2 were used as orbital and auxiliary basis sets, respectively. In calculations of the model 3N1O, was built a smaller model from 3Nb1 model (Rivillas-Acevedo L. et al. Inorg. Chem 2011, 50, 1956 -1972) with the sequence CH<sub>3</sub>-TAMAHM-CH<sub>3</sub>. The optimizations were carried out using the ORCA program with



the functional B3LYP and BP86, TZVP basis set was used to the Cu(II) ion, nitrogen and oxygen atoms. Implicit solvation model COSMO was included in these calculations.

*Matrix-Assisted Laser Desorption/Ionization time of flight/time of flight (MALDI-TOF/TOF) Mass Spectrometry.* Molecular masses of native and modified peptides were determined in a 4800 MALDI-TOF/TOF plus instrument (AB Sciex, Framingham, MA). Briefly, in the reoxidation kinetics experiments, Cu(II)-peptide samples were taken before reduction (aerobic conditions) and after re-oxidation by oxygen (Cu(I)-complex with ~ 0.5 equiv of O<sub>2</sub>). In order to remove the metal ion, the samples were treated 15 equiv of ethylenediaminetetraacetic acid (EDTA), loaded into C-18 micro-columns (C18 ZipTip Agilent Technologies, Santa Clara, CA), and eluted with 0.1 % trifluoroacetic acid (TFA) in 50 % acetonitrile (ACN). The eluted peptides were concentrated in a volume of 2  $\mu$ L and mixed in the matrix solution ( $\alpha$ -cyano-4-hydroxycinnamic acid in 50 % aqueous acetonitrile containing 0.1 % TFA). Cumulative 1000 scans were collected on a mass range of 850-4000 Da and analyzed by Data Explorer software v. 4.9 (AB Sciex, Framingham, MA). External calibration was performed with a mixture of peptide standards.

## Cartesian Coordinates for Optimized Structures

### 2N2Sb Model

|   |           |           |           |
|---|-----------|-----------|-----------|
| C | 0.000000  | 0.000000  | 0.000000  |
| O | 0.000000  | 0.000000  | 1.241000  |
| N | 1.149300  | 0.000000  | -0.716600 |
| H | 2.005700  | -0.250100 | -0.230700 |
| H | 1.182200  | -0.097100 | -1.734000 |
| C | -1.278200 | 0.003300  | -0.837500 |
| C | -2.450700 | 0.764900  | -0.154700 |
| N | -3.736300 | 0.203300  | -0.620900 |
| C | -4.907400 | 0.467000  | 0.015500  |
| O | -4.961600 | 1.276600  | 0.950100  |
| H | -3.694000 | -0.521600 | -1.334100 |
| C | -2.289200 | 2.269800  | -0.430200 |
| O | -1.334300 | 2.864400  | 0.118700  |
| N | -3.152300 | 2.852000  | -1.265800 |
| H | -3.849000 | 2.238700  | -1.686600 |
| C | -3.172800 | 4.271300  | -1.715600 |
| C | -3.049000 | 5.279900  | -0.548500 |
| O | -3.839200 | 5.159700  | 0.444000  |
| N | -2.147227 | 6.238468  | -0.745917 |
| C | -2.091800 | 7.225600  | 0.360600  |
| H | -2.324800 | 4.438300  | -2.408200 |
| C | -1.343800 | 8.560300  | 0.124200  |
| O | -1.982200 | 9.609700  | 0.311900  |
| N | 0.018600  | 8.637400  | -0.027400 |
| C | 0.871400  | 7.744100  | -0.829700 |
| H | 0.352300  | 9.600100  | 0.030000  |
| H | 0.247500  | 6.917700  | -1.180500 |
| C | 2.081700  | 7.226500  | -0.032300 |
| O | 2.716700  | 7.987800  | 0.699300  |
| N | 2.553400  | 5.943300  | -0.214600 |
| H | 3.472800  | 5.862300  | 0.224800  |
| C | 2.138700  | 4.685900  | -0.877300 |
| C | 0.917700  | 4.652700  | -1.838100 |
| C | 1.202400  | 5.181400  | -3.264100 |
| H | 1.710900  | 6.161300  | -3.283900 |
| H | 0.049800  | 5.172600  | -1.386900 |
| H | -2.377700 | 0.638300  | 0.942100  |
| C | -6.144000 | -0.320400 | -0.509700 |
| N | -7.343900 | 0.105400  | 0.195200  |
| C | -7.707700 | -0.404200 | 1.413000  |
| O | -7.079500 | -1.303800 | 1.976100  |
| H | -7.914800 | 0.815400  | -0.243200 |

|   |            |           |           |
|---|------------|-----------|-----------|
| C | -8.961000  | 0.280800  | 1.984900  |
| N | -9.452900  | -0.465500 | 3.141000  |
| C | -10.777100 | -0.413000 | 3.497500  |
| O | -11.578100 | 0.319900  | 2.908500  |
| H | -8.823300  | -1.139100 | 3.560900  |
| C | -11.159400 | -1.298900 | 4.662000  |
| C | -6.345700  | -0.172900 | -2.042600 |
| O | -6.645300  | 1.225300  | -2.243500 |
| H | -6.983600  | 1.322800  | -3.149700 |
| C | -7.446400  | -1.100800 | -2.579700 |
| H | -8.429800  | -0.874100 | -2.135800 |
| H | -10.314200 | -1.857300 | 5.101700  |
| H | -11.927900 | -2.017200 | 4.324000  |
| H | -11.636300 | -0.686800 | 5.450000  |
| C | -4.534000  | 4.461100  | -2.445200 |
| C | -4.936700  | 5.942900  | -2.671400 |
| H | -4.993600  | 6.494900  | -1.711500 |
| H | -7.192900  | -2.158000 | -2.356200 |
| H | -1.103300  | 0.366100  | -1.873600 |
| H | -7.524100  | -1.002900 | -3.683500 |
| H | 1.803600   | 4.453800  | -3.848900 |
| H | 0.586500   | 3.593300  | -1.915800 |
| C | 3.394400   | 4.110700  | -1.617000 |
| O | 4.287500   | 4.820000  | -2.074900 |
| N | 3.374800   | 2.748400  | -1.710700 |
| C | 4.321100   | 2.005800  | -2.553600 |
| H | 2.566600   | 2.225700  | -1.374400 |
| C | 3.528900   | 1.257200  | -3.635800 |
| O | 2.519400   | 0.590600  | -3.356100 |
| N | 4.019200   | 1.338200  | -4.889100 |
| H | 3.598600   | 0.765000  | -5.616800 |
| H | 4.875800   | 1.844800  | -5.108100 |
| C | 5.175100   | 1.014500  | -1.719600 |
| H | 4.532300   | 0.325000  | -1.143100 |
| H | 5.803100   | 1.595200  | -1.017400 |
| H | 5.845100   | 0.429500  | -2.380100 |
| H | 5.010400   | 2.754200  | -2.996300 |
| H | -4.539200  | 3.886200  | -3.398000 |
| H | -3.120800  | 7.582400  | 0.595300  |
| C | -8.711900  | 1.782900  | 2.334500  |
| C | -7.583900  | 2.031000  | 3.365500  |
| H | -7.886200  | 1.534800  | 4.309200  |
| H | -9.673200  | 2.162100  | 2.736100  |
| C | -7.351100  | 3.553100  | 3.620500  |
| C | -6.095400  | 4.129900  | 2.930600  |
| N | -6.102400  | 3.866800  | 1.451900  |

|   |           |           |           |
|---|-----------|-----------|-----------|
| H | -6.944000 | 4.286700  | 1.045900  |
| H | -6.082000 | 2.848600  | 1.243200  |
| H | -5.274700 | 4.312300  | 0.939000  |
| H | -5.173600 | 3.679700  | 3.344200  |
| H | -6.033300 | 5.230700  | 3.059800  |
| H | -6.647300 | 1.531100  | 3.040800  |
| H | -7.199800 | 3.734300  | 4.706400  |
| H | -8.249700 | 4.139500  | 3.328500  |
| H | 1.839900  | 3.980600  | -0.064800 |
| H | -9.755900 | 0.274600  | 1.205400  |
| H | -5.406400 | -0.423900 | -2.585200 |
| H | -8.553600 | 2.346800  | 1.386900  |
| H | -5.339500 | 4.035100  | -1.799500 |
| S | -3.829600 | 6.968600  | -3.688800 |
| H | -5.968000 | -1.393600 | -0.255400 |
| H | -5.947700 | 5.986900  | -3.144200 |
| C | 1.473800  | 8.580500  | -2.002900 |
| C | 0.410100  | 9.209800  | -2.878600 |
| C | 0.508000  | 10.425500 | -3.516100 |
| N | -0.695700 | 10.645300 | -4.133800 |
| C | -1.500900 | 9.600300  | -3.849000 |
| N | -0.865900 | 8.693900  | -3.103900 |
| H | -0.966600 | 11.478800 | -4.675300 |
| H | -2.522800 | 9.544500  | -4.200300 |
| H | 1.327800  | 11.139400 | -3.556500 |
| H | 2.177300  | 7.954200  | -2.595500 |
| H | 2.094100  | 9.394800  | -1.559700 |
| H | -1.570000 | -1.074800 | -0.902500 |
| C | -3.927500 | 6.130000  | -5.306300 |
| H | -3.333900 | 5.201600  | -5.299300 |
| H | -3.559300 | 6.849000  | -6.062500 |
| H | -4.987700 | 5.906400  | -5.542200 |
| C | -1.570500 | 6.655400  | 1.738500  |
| C | -0.420500 | 5.607800  | 1.691700  |
| H | 0.530900  | 6.092000  | 1.409500  |
| H | -2.451900 | 6.210300  | 2.237600  |
| H | -1.228700 | 7.530500  | 2.331200  |
| H | -0.665100 | 4.826400  | 0.946400  |
| C | -0.231900 | 4.981000  | 3.105900  |
| C | 0.769100  | 3.803800  | 3.121600  |
| N | 0.124800  | 2.544000  | 2.583500  |
| H | -0.576800 | 2.191700  | 3.246800  |
| H | 0.795900  | 1.770600  | 2.445800  |
| H | -0.362500 | 2.687400  | 1.661200  |
| H | 1.659000  | 4.029000  | 2.498900  |
| H | 1.103000  | 3.586400  | 4.151500  |

|    |           |           |           |
|----|-----------|-----------|-----------|
| H  | 0.155100  | 5.743100  | 3.814000  |
| H  | -1.202200 | 4.616800  | 3.503600  |
| S  | -0.405800 | 5.395800  | -4.123900 |
| C  | 0.107100  | 6.322600  | -5.595500 |
| H  | 0.386300  | 7.349800  | -5.312300 |
| H  | -0.737100 | 6.334200  | -6.309700 |
| H  | 0.963400  | 5.805200  | -6.071100 |
| Cu | -1.713700 | 6.825300  | -2.715100 |
| O  | -2.324700 | 2.010600  | -4.375000 |
| H  | -2.184400 | 1.563500  | -5.226000 |
| H  | -1.723800 | 2.778600  | -4.403100 |
| O  | -4.047300 | 10.931800 | -5.601600 |
| H  | -4.417200 | 10.413500 | -6.339000 |
| H  | -4.755400 | 10.968200 | -4.922600 |
| O  | -6.019500 | 10.781200 | -3.400700 |
| H  | -5.595700 | 10.507900 | -2.560200 |
| H  | -6.548600 | 11.557200 | -3.161600 |
| H  | -4.067600 | 9.494700  | -8.799600 |
| O  | -4.568900 | 9.086600  | -8.075000 |
| H  | -5.446100 | 8.926300  | -8.460600 |
| H  | -3.945600 | 9.846100  | -0.326300 |
| O  | -4.882700 | 9.822500  | -0.616800 |
| H  | -5.349500 | 10.302400 | 0.085400  |
| H  | -2.667600 | 12.276500 | -5.990800 |
| O  | -1.744900 | 12.602900 | -6.079600 |
| H  | -1.810600 | 13.568900 | -6.105300 |

#### 2N2Sa model

|   |           |           |           |
|---|-----------|-----------|-----------|
| C | 0.000000  | 0.000000  | 0.000000  |
| O | 0.000000  | 0.000000  | 1.254500  |
| N | 1.126900  | 0.000000  | -0.722800 |
| C | 2.479900  | 0.098000  | -0.164400 |
| H | 1.084900  | -0.095000 | -1.739600 |
| C | -1.294500 | 0.025800  | -0.846200 |
| N | -2.443900 | 0.096600  | 0.068500  |
| C | -3.576700 | -0.675100 | -0.018200 |
| O | -4.232600 | -0.921800 | 1.008900  |
| H | -2.267700 | 0.525800  | 0.969900  |
| C | -3.953600 | -1.086600 | -1.457600 |
| N | -3.211899 | -2.297281 | -1.936654 |
| C | -3.892600 | -3.533100 | -1.783400 |
| O | -5.041400 | -3.822900 | -2.176800 |
| C | 3.346700  | 0.772200  | -1.246800 |
| O | 3.152000  | 0.544500  | -2.446500 |
| N | 4.334100  | 1.578300  | -0.802400 |

|   |           |            |           |
|---|-----------|------------|-----------|
| H | 4.481300  | 1.797100   | 0.180200  |
| H | 4.950400  | 2.008800   | -1.487000 |
| C | 3.066400  | -1.297100  | 0.177100  |
| C | -5.481600 | -0.935100  | -1.722400 |
| C | -5.649100 | -0.347300  | -3.100800 |
| C | -6.680000 | 0.400800   | -3.617300 |
| N | -6.333400 | 0.689600   | -4.919000 |
| C | -5.121600 | 0.138400   | -5.163900 |
| N | -4.684900 | -0.513200  | -4.091200 |
| H | -6.881800 | 1.247300   | -5.568900 |
| H | -4.606100 | 0.232200   | -6.114200 |
| H | -7.611400 | 0.744600   | -3.173900 |
| C | -3.133800 | -4.728900  | -1.097100 |
| N | -3.074900 | -6.001800  | -1.883300 |
| C | -2.268000 | -6.429900  | -2.863200 |
| O | -2.258300 | -7.635600  | -3.212800 |
| H | -3.712700 | -6.718400  | -1.541000 |
| C | -1.330500 | -5.424900  | -3.544100 |
| N | 0.023500  | -5.962300  | -3.309900 |
| C | 1.178400  | -5.291000  | -3.547100 |
| O | 1.234600  | -4.114800  | -3.926700 |
| H | 0.090200  | -6.979000  | -3.221400 |
| C | -1.800000 | -4.431400  | -0.351600 |
| C | -2.109800 | -3.898500  | 1.071500  |
| C | -0.848500 | -3.615400  | 1.929100  |
| C | -1.230200 | -2.893300  | 3.238600  |
| N | -1.769500 | -1.501100  | 2.973900  |
| H | -1.088600 | -0.931900  | 2.412700  |
| H | -1.924400 | -1.014300  | 3.868600  |
| C | 2.427900  | -6.165200  | -3.238800 |
| N | 2.795600  | -6.987900  | -4.413800 |
| C | 2.274900  | -8.214100  | -4.649300 |
| O | 1.334800  | -8.677500  | -3.979200 |
| H | 3.562600  | -6.653100  | -4.989100 |
| H | 2.176300  | -6.865700  | -2.424000 |
| C | 2.973000  | -8.974700  | -5.816600 |
| N | 2.735600  | -10.406300 | -5.706700 |
| C | 3.307200  | -11.156100 | -4.717600 |
| O | 4.224600  | -10.745100 | -4.001700 |
| H | 1.953900  | -10.778900 | -6.234800 |
| C | 2.613200  | -12.515600 | -4.541900 |
| N | 3.388800  | -13.392400 | -3.670500 |
| C | 3.462300  | -14.744700 | -3.907300 |
| O | 2.782800  | -15.292700 | -4.780000 |
| H | 4.025300  | -12.938300 | -3.023200 |
| C | 4.415000  | -15.485000 | -2.995600 |

|   |           |            |           |
|---|-----------|------------|-----------|
| C | 2.504800  | -8.458700  | -7.204800 |
| O | 1.160800  | -8.958900  | -7.366900 |
| H | 0.927000  | -8.844700  | -8.302900 |
| C | 3.446800  | -8.926000  | -8.325900 |
| H | -3.877300 | -5.002800  | -0.318600 |
| C | 3.641900  | -5.310800  | -2.800900 |
| C | 4.457000  | -6.027600  | -1.722000 |
| O | 3.914500  | -6.623600  | -0.788300 |
| N | 5.804100  | -5.908100  | -1.830100 |
| H | 6.390300  | -6.361000  | -1.134600 |
| H | 6.263400  | -5.468100  | -2.621500 |
| C | -1.676200 | -5.340000  | -5.061900 |
| C | -3.176500 | -4.974000  | -5.288300 |
| H | -3.825800 | -5.185600  | -4.413400 |
| H | -3.501800 | -0.281400  | -2.071500 |
| H | -0.996200 | -4.587800  | -5.502900 |
| H | 2.484000  | -1.749200  | 1.001500  |
| H | 3.477700  | -10.026300 | -8.397000 |
| H | -2.017900 | -3.448300  | 3.785600  |
| H | 5.187700  | -15.976500 | -3.614200 |
| H | -0.350500 | -2.778000  | 3.900400  |
| H | 3.872300  | -16.298500 | -2.478700 |
| H | 4.913100  | -14.848300 | -2.241200 |
| H | -1.398200 | -4.413800  | -3.103800 |
| H | 3.024700  | -1.948500  | -0.712400 |
| H | -1.213000 | -5.376300  | -0.278900 |
| H | 4.117800  | -1.198300  | 0.512300  |
| H | -5.938500 | -0.262300  | -0.966000 |
| H | 3.125300  | -8.511300  | -9.305400 |
| H | 4.262900  | -4.991900  | -3.669500 |
| H | -2.719800 | -2.981800  | 0.960000  |
| H | 3.275400  | -4.362800  | -2.354300 |
| H | 4.068800  | -8.804800  | -5.695900 |
| H | 4.478500  | -8.561100  | -8.135500 |
| H | -0.396000 | -4.586500  | 2.241300  |
| H | -1.361700 | -0.951000  | -1.362100 |
| H | -2.721200 | -4.659100  | 1.608200  |
| H | -3.602300 | -5.563000  | -6.134100 |
| H | -6.003900 | -1.908800  | -1.671800 |
| H | -1.474400 | -6.322200  | -5.540000 |
| C | 1.192900  | -12.149400 | -3.982200 |
| C | 0.457000  | -13.217800 | -3.140300 |
| C | -1.031000 | -12.848200 | -2.909000 |
| C | -1.326800 | -11.434300 | -2.361100 |
| N | -1.261200 | -10.345500 | -3.417900 |
| H | -1.768000 | -10.644100 | -4.261300 |

|    |           |            |           |
|----|-----------|------------|-----------|
| H  | -0.290500 | -10.100900 | -3.699400 |
| H  | -1.721400 | -9.461300  | -3.102300 |
| H  | -0.635700 | -11.143400 | -1.545900 |
| H  | -2.362600 | -11.407700 | -1.968900 |
| H  | 0.496500  | -14.187500 | -3.673700 |
| H  | -1.444500 | -13.543300 | -2.143800 |
| H  | 1.322400  | -11.240100 | -3.365100 |
| H  | 0.993200  | -13.343400 | -2.177500 |
| H  | 2.479800  | -13.034100 | -5.514300 |
| C  | -1.334700 | 1.186100   | -1.893400 |
| C  | -0.681700 | 0.898600   | -3.279400 |
| H  | -2.400800 | 1.434600   | -2.057400 |
| H  | -1.160900 | 1.544000   | -4.045100 |
| H  | 0.401300  | 1.135600   | -3.290500 |
| H  | -0.861100 | 2.112500   | -1.500800 |
| H  | -0.083300 | -3.037600  | 1.374700  |
| H  | 0.559300  | -11.912100 | -4.866000 |
| H  | 2.433500  | 0.700200   | 0.766100  |
| H  | -1.193400 | -3.700400  | -0.913500 |
| H  | -1.624500 | -13.031000 | -3.832800 |
| H  | 2.479200  | -7.345000  | -7.196500 |
| H  | -2.677400 | -1.505100  | 2.460200  |
| S  | -3.547776 | -3.247724  | -5.653195 |
| C  | -2.666476 | -2.964024  | -7.217595 |
| H  | -1.571176 | -2.987724  | -7.092595 |
| H  | -2.989876 | -1.978524  | -7.597695 |
| H  | -2.970676 | -3.738924  | -7.948095 |
| S  | -0.820900 | -0.862400  | -3.771000 |
| C  | 0.161500  | -0.863100  | -5.293700 |
| H  | 0.333800  | -1.923100  | -5.540600 |
| Cu | -2.989700 | -1.764300  | -3.945300 |
| H  | -0.355300 | -0.326200  | -6.113000 |
| H  | 1.130800  | -0.375400  | -5.079400 |
| O  | -7.022373 | -3.744180  | -7.267703 |
| H  | -6.062373 | -3.744180  | -7.267703 |
| H  | -7.342828 | -2.839244  | -7.267703 |
| O  | -2.220951 | -6.054721  | -8.186730 |
| H  | -1.296676 | -6.314174  | -8.186730 |
| O  | -8.099032 | -5.844430  | -0.865522 |
| H  | -8.401014 | -4.978694  | -1.149965 |
| O  | 0.284886  | -7.003986  | 2.011218  |
| H  | 1.186186  | -7.086804  | 1.691218  |
| O  | -5.986398 | -8.562586  | -2.788799 |
| H  | -5.030863 | -8.652491  | -2.810478 |
| H  | -6.222241 | -7.633732  | -2.845440 |
| O  | -5.223331 | -6.282555  | -9.495495 |



|   |           |           |           |
|---|-----------|-----------|-----------|
| H | -2.775010 | -6.838696 | -8.186730 |
| H | -5.745703 | -7.021695 | -9.815495 |
| H | -5.223331 | -6.282555 | -8.535495 |
| H | -8.251904 | -5.942893 | 0.077100  |
| H | 0.284886  | -7.003986 | 2.971218  |

#### 1N1O2Sa Model

|   |            |            |           |
|---|------------|------------|-----------|
| C | 0.000000   | 0.000000   | 0.000000  |
| O | 0.000000   | 0.000000   | 1.241700  |
| N | 1.134800   | 0.000000   | -0.725000 |
| H | 2.027400   | 0.062000   | -0.242000 |
| H | 1.137900   | 0.023700   | -1.742800 |
| C | -1.317800  | 0.041700   | -0.787200 |
| N | -2.291700  | -0.776400  | -0.046800 |
| C | -3.368300  | -1.348900  | -0.629400 |
| O | -3.677300  | -1.178600  | -1.818100 |
| H | -2.118200  | -0.870800  | 0.951500  |
| C | -1.791900  | 1.514800   | -0.930400 |
| H | -2.041600  | 1.929100   | 0.061200  |
| H | -2.671500  | 1.546800   | -1.599000 |
| H | -0.990200  | 2.128200   | -1.387500 |
| H | -1.209100  | -0.389400  | -1.803800 |
| C | -4.216500  | -2.260600  | 0.302600  |
| N | -5.569900  | -2.246800  | -0.305600 |
| C | -6.722700  | -2.439600  | 0.362300  |
| O | -6.829100  | -3.052000  | 1.445000  |
| H | -5.580300  | -1.755600  | -1.204300 |
| C | -7.903600  | -1.658900  | -0.209800 |
| N | -9.115200  | -2.368100  | -0.664700 |
| C | -9.539200  | -3.654400  | -0.901900 |
| O | -10.685300 | -3.810700  | -1.339200 |
| H | -9.838200  | -1.726900  | -0.989200 |
| C | -8.646700  | -4.859100  | -0.583100 |
| N | -8.976500  | -5.267900  | 0.794300  |
| C | -8.132700  | -5.996100  | 1.548500  |
| O | -7.044700  | -6.442700  | 1.135100  |
| H | -9.868300  | -4.948900  | 1.184800  |
| C | -8.595200  | -6.227500  | 2.996600  |
| N | -8.531900  | -7.682200  | 3.269200  |
| C | -9.663000  | -8.385300  | 3.547000  |
| O | -10.755800 | -7.891800  | 3.840100  |
| H | -7.690600  | -8.181500  | 2.979200  |
| C | -7.719300  | -5.395700  | 3.985900  |
| C | -9.530200  | -9.911900  | 3.344900  |
| N | -10.117700 | -10.660200 | 4.461300  |

|   |            |            |           |
|---|------------|------------|-----------|
| C | -9.396200  | -11.061400 | 5.554000  |
| O | -8.194700  | -10.839800 | 5.712100  |
| H | -11.133000 | -10.647500 | 4.537100  |
| C | -10.276600 | -11.813300 | 6.575000  |
| N | -9.598000  | -12.988900 | 7.109400  |
| C | -9.214000  | -14.032200 | 6.342800  |
| O | -9.394500  | -14.086400 | 5.114700  |
| H | -9.279800  | -12.917300 | 8.073100  |
| C | -3.568200  | -3.660100  | 0.446300  |
| C | -8.525100  | -15.232400 | 7.046200  |
| N | -7.250200  | -15.439100 | 6.317500  |
| C | -5.961700  | -15.412700 | 6.720000  |
| O | -5.562100  | -15.190600 | 7.885200  |
| H | -7.399700  | -15.603900 | 5.327200  |
| C | -4.973000  | -15.666300 | 5.608100  |
| C | -8.457500  | -15.164700 | 8.592200  |
| H | -7.724800  | -14.407700 | 8.918000  |
| C | -8.185100  | -16.558800 | 9.220100  |
| C | -8.436100  | -4.047700  | 4.269800  |
| H | -4.257000  | -16.437200 | 5.943200  |
| H | -7.568100  | -4.573700  | -0.623100 |
| H | -4.389200  | -14.742200 | 5.440700  |
| H | -5.420600  | -15.985000 | 4.648700  |
| C | -4.022600  | -4.473100  | 1.691700  |
| H | -5.046200  | -4.860200  | 1.547800  |
| H | -7.623400  | -5.979000  | 4.922000  |
| H | -4.311800  | -1.796600  | 1.301000  |
| H | -2.466300  | -3.540100  | 0.465900  |
| H | -7.373500  | -17.074600 | 8.668400  |
| H | -8.474900  | -10.232800 | 3.250700  |
| H | -6.716000  | -5.214200  | 3.554700  |
| H | -8.836900  | -3.588700  | 3.347800  |
| H | -7.555600  | -1.026600  | -1.057100 |
| H | -11.190100 | -12.158400 | 6.045100  |
| H | -3.811300  | -4.270700  | -0.448700 |
| H | -9.101500  | -17.172100 | 9.080000  |
| H | -9.660300  | -5.951500  | 3.129400  |
| H | -3.344200  | -5.348400  | 1.811400  |
| H | -9.279600  | -4.232100  | 4.982100  |
| C | -7.873100  | -16.487100 | 10.748900 |
| C | -6.409900  | -16.799500 | 11.108200 |
| N | -5.458400  | -15.741100 | 10.591300 |
| H | -5.705200  | -14.819500 | 10.978400 |
| H | -4.495000  | -15.950700 | 10.899200 |
| H | -5.458400  | -15.660400 | 9.534900  |
| H | -6.088800  | -17.766700 | 10.678700 |

|   |            |            |           |
|---|------------|------------|-----------|
| H | -6.282300  | -16.844500 | 12.205900 |
| H | -8.161800  | -15.501000 | 11.171000 |
| H | -8.478900  | -17.238400 | 11.300300 |
| C | -10.308800 | -10.228200 | 2.028200  |
| C | -10.171300 | -11.612100 | 1.398600  |
| O | -10.304400 | -11.737100 | 0.156200  |
| N | -9.963300  | -12.693300 | 2.157800  |
| H | -9.916000  | -13.597800 | 1.693900  |
| H | -9.884700  | -12.687700 | 3.177700  |
| H | -11.394300 | -10.043500 | 2.191800  |
| H | -9.981400  | -9.510100  | 1.247600  |
| C | -8.781000  | -6.027300  | -1.622300 |
| C | -10.122400 | -6.810000  | -1.637200 |
| C | -9.895100  | -8.265000  | -2.134100 |
| C | -11.223100 | -9.046000  | -2.106800 |
| N | -10.958100 | -10.534900 | -2.211400 |
| H | -10.232700 | -10.725900 | -2.918800 |
| H | -11.811600 | -11.046200 | -2.487300 |
| H | -10.637400 | -10.930200 | -1.274100 |
| H | -11.782600 | -8.878500  | -1.166800 |
| H | -10.579900 | -6.843600  | -0.627000 |
| H | -7.942600  | -6.718900  | -1.401700 |
| H | -9.128900  | -8.776100  | -1.511600 |
| H | -11.871400 | -8.747400  | -2.958100 |
| H | -10.845100 | -6.282100  | -2.295800 |
| H | -9.173100  | -16.096600 | 6.773700  |
| C | -8.335900  | -0.700800  | 0.961100  |
| C | -7.233500  | 0.164800   | 1.531700  |
| C | -7.065800  | 1.509300   | 1.310200  |
| N | -6.023500  | 1.911800   | 2.109800  |
| C | -5.562800  | 0.828400   | 2.775700  |
| N | -6.271200  | -0.254000  | 2.461000  |
| H | -5.633900  | 2.848000   | 2.168700  |
| H | -4.754600  | 0.872000   | 3.503800  |
| H | -7.629400  | 2.199400   | 0.685400  |
| H | -8.803200  | -1.302000  | 1.764600  |
| H | -9.114200  | -0.011900  | 0.561800  |
| H | -8.573000  | -5.599500  | -2.631500 |
| H | -9.478500  | -14.873300 | 8.941300  |
| H | -9.528100  | -8.227800  | -3.189200 |
| C | -10.703200 | -10.859200 | 7.757000  |
| O | -9.728000  | -10.884600 | 8.818400  |
| C | -12.055600 | -11.277000 | 8.343500  |
| H | -8.969700  | -10.359100 | 8.511900  |
| H | -12.023900 | -12.302400 | 8.752500  |
| H | -12.847900 | -11.222800 | 7.570900  |

|    |            |            |          |
|----|------------|------------|----------|
| H  | -10.801500 | -9.829000  | 7.359300 |
| H  | -12.322800 | -10.587700 | 9.170300 |
| S  | -4.054338  | -3.641830  | 3.307949 |
| C  | -2.355638  | -3.032630  | 3.564549 |
| H  | -2.068238  | -2.237130  | 2.858749 |
| H  | -2.316838  | -2.638330  | 4.594849 |
| H  | -1.658938  | -3.892130  | 3.461449 |
| S  | -7.402750  | -2.729820  | 4.983767 |
| C  | -6.556350  | -3.529620  | 6.377467 |
| H  | -5.820250  | -4.264620  | 6.010867 |
| H  | -7.312650  | -3.989320  | 7.043767 |
| H  | -6.023550  | -2.717120  | 6.901367 |
| Cu | -5.905187  | -2.178033  | 3.272499 |
| O  | -0.573600  | 0.050800   | 4.217300 |
| H  | -0.241900  | 0.144000   | 3.302800 |
| H  | 0.219300   | 0.052000   | 4.774000 |
| H  | -2.203400  | 0.878200   | 4.824500 |
| O  | -3.113600  | 1.105200   | 5.126200 |
| H  | -3.027900  | 1.971900   | 5.550900 |
| H  | -11.603000 | -3.537600  | 2.702800 |
| O  | -11.617200 | -4.377900  | 2.205100 |
| H  | -12.443000 | -4.358800  | 1.700000 |
| O  | -3.721300  | -1.495600  | 6.630500 |
| H  | -3.320000  | -1.481000  | 7.513100 |
| H  | -3.566100  | -0.596500  | 6.277500 |
| H  | -10.761300 | -1.568200  | 4.516400 |
| O  | -11.053000 | -1.629500  | 3.592000 |
| H  | -11.638300 | -0.866100  | 3.467800 |
| O  | -6.890400  | -9.523500  | 1.034800 |
| H  | -6.057500  | -9.975600  | 0.829300 |
| H  | -6.695000  | -8.575300  | 0.896900 |

#### 1N1O2Sc1

|   |           |           |           |
|---|-----------|-----------|-----------|
| C | 0.010971  | -0.004242 | -0.009208 |
| O | 0.010971  | -0.004242 | 1.230392  |
| N | 1.144371  | -0.004242 | -0.735908 |
| H | 1.171771  | 0.025858  | -1.752108 |
| H | 2.027471  | 0.026658  | -0.234208 |
| C | -1.317829 | -0.003842 | -0.800508 |
| N | -2.351629 | -0.189442 | 0.232592  |
| C | -3.583129 | -0.669342 | 0.031992  |
| O | -4.068229 | -0.882642 | -1.102108 |
| C | -1.527029 | 1.300558  | -1.608208 |
| C | -4.431529 | -0.964142 | 1.295392  |
| N | -3.707029 | -1.891742 | 2.198992  |

|   |            |            |            |
|---|------------|------------|------------|
| C | -4.042329  | -3.165442  | 2.526492   |
| O | -3.295129  | -3.870842  | 3.214692   |
| H | -2.803229  | -1.610342  | 2.580792   |
| C | -4.879529  | 0.328358   | 2.025692   |
| C | -5.845229  | 1.160258   | 1.132892   |
| H | -1.939229  | -0.081442  | 1.167892   |
| C | -5.442529  | -3.740542  | 2.125192   |
| N | -5.236229  | -5.205342  | 2.111092   |
| C | -5.877829  | -6.220642  | 1.509392   |
| O | -5.357129  | -7.364242  | 1.523592   |
| C | -7.281329  | -6.061842  | 0.898492   |
| N | -7.348029  | -6.806042  | -0.375708  |
| C | -7.811329  | -6.465542  | -1.607408  |
| O | -7.988429  | -7.368142  | -2.445008  |
| H | -7.110229  | -7.793142  | -0.324908  |
| C | -8.091329  | -4.985142  | -1.998408  |
| N | -7.923929  | -4.931042  | -3.455808  |
| C | -7.412129  | -3.882042  | -4.141508  |
| O | -6.918229  | -2.874142  | -3.607108  |
| H | -8.300129  | -5.721942  | -3.981408  |
| H | -4.345429  | -5.452142  | 2.559492   |
| C | -7.403629  | -4.086242  | -5.679208  |
| N | -8.742629  | -4.400742  | -6.214708  |
| C | -9.214929  | -5.653042  | -6.339408  |
| O | -8.567629  | -6.634642  | -5.913908  |
| C | -6.775229  | -2.897942  | -6.444508  |
| C | -7.666429  | -1.664242  | -6.587108  |
| O | -8.847829  | -1.622542  | -6.203208  |
| N | -7.074229  | -0.607842  | -7.183508  |
| H | -6.126229  | -0.645442  | -7.549008  |
| H | -7.633229  | 0.220658   | -7.377808  |
| H | -9.296829  | -3.588542  | -6.481708  |
| C | -10.585129 | -5.742542  | -7.050308  |
| N | -10.858029 | -7.102942  | -7.496208  |
| C | -10.380629 | -7.591642  | -8.680808  |
| O | -9.641529  | -6.935542  | -9.420708  |
| H | -11.508829 | -7.647842  | -6.946408  |
| C | -10.820829 | -9.042942  | -8.943708  |
| N | -10.508829 | -9.424542  | -10.318508 |
| C | -11.222029 | -10.417242 | -10.945608 |
| O | -12.084729 | -11.066542 | -10.346608 |
| C | -10.853529 | -10.655842 | -12.391408 |
| H | -9.876129  | -8.825542  | -10.836208 |
| C | -11.721429 | -5.253942  | -6.109308  |
| O | -11.865129 | -6.292642  | -5.131508  |
| H | -12.611429 | -6.062142  | -4.535208  |

|   |            |            |            |
|---|------------|------------|------------|
| C | -13.007929 | -4.972442  | -6.897908  |
| C | -10.177529 | -10.024842 | -7.915908  |
| C | -8.631729  | -9.962442  | -7.866508  |
| C | -8.044229  | -10.871542 | -6.743608  |
| C | -7.504929  | -10.098042 | -5.526108  |
| N | -8.567729  | -9.222142  | -4.903208  |
| H | -9.367829  | -9.799242  | -4.617108  |
| H | -8.225529  | -8.750242  | -4.040908  |
| C | -6.381629  | -3.256442  | 3.281292   |
| C | -7.877729  | -3.328642  | 3.107192   |
| C | -8.774229  | -3.842142  | 4.014992   |
| N | -10.023729 | -3.620842  | 3.485392   |
| C | -9.871029  | -2.976242  | 2.305492   |
| N | -8.579829  | -2.780742  | 2.034592   |
| H | -10.910229 | -3.840742  | 3.933892   |
| H | -8.897129  | -8.452342  | -5.540608  |
| C | -9.546229  | -4.584842  | -1.591808  |
| C | -10.003429 | -3.198042  | -2.169708  |
| C | -8.330829  | -6.641542  | 1.919692   |
| C | -8.318229  | -8.185342  | 2.194992   |
| C | -8.204529  | -8.562842  | 3.698092   |
| C | -6.854929  | -8.294142  | 4.391392   |
| N | -5.709429  | -9.029542  | 3.724992   |
| H | -4.860429  | -8.976942  | 4.312592   |
| H | -5.938029  | -10.028842 | 3.597592   |
| H | -8.599729  | -4.345542  | 4.968192   |
| H | -10.688229 | -2.654342  | 1.664292   |
| H | -10.023129 | -10.026842 | -12.757308 |
| H | -13.379029 | -5.879042  | -7.409308  |
| H | -1.484329  | 2.184558   | -0.949808  |
| H | -11.079429 | -3.243242  | -2.454708  |
| H | -11.745129 | -10.474942 | -13.018308 |
| H | -10.590729 | -11.720642 | -12.531708 |
| H | -2.506229  | 1.267858   | -2.120708  |
| H | -0.749129  | 1.409858   | -2.387708  |
| H | -9.409329  | -2.893142  | -3.045308  |
| H | -6.665029  | -9.438742  | -5.814708  |
| H | -13.807229 | -4.606642  | -6.221608  |
| H | -5.912829  | 2.210358   | 1.491392   |
| H | -12.816629 | -4.190442  | -7.663408  |
| H | -5.341929  | -1.479342  | 0.949792   |
| H | -5.839729  | -2.589542  | -5.931008  |
| H | -7.159129  | -10.791142 | -4.732508  |
| H | -6.912529  | -8.636242  | 5.442392   |
| H | -9.337429  | -6.362742  | 1.541392   |
| H | -5.489629  | -8.579642  | 2.799592   |

|    |            |            |           |
|----|------------|------------|-----------|
| H  | -8.256029  | -10.299542 | -8.853108 |
| H  | -7.542429  | -8.710242  | 1.606792  |
| H  | -7.180129  | -11.447542 | -7.138308 |
| H  | -5.502029  | 1.208958   | 0.080892  |
| H  | -9.286129  | -8.610842  | 1.841592  |
| H  | -7.568129  | -5.007442  | 0.750392  |
| H  | -5.350929  | 0.059858   | 2.994192  |
| H  | -7.316229  | -4.334242  | -1.543308 |
| H  | -8.959329  | -8.001642  | 4.286492  |
| H  | -6.154129  | -2.185642  | 3.466392  |
| H  | -8.211029  | -6.074642  | 2.866492  |
| H  | -10.265329 | -5.332542  | -1.994908 |
| H  | -9.660829  | -4.580042  | -0.488708 |
| H  | -6.588129  | -7.220842  | 4.407092  |
| H  | -10.497329 | -11.044142 | -8.215808 |
| H  | -6.506629  | -3.250542  | -7.465608 |
| H  | -6.771829  | -4.980342  | -5.867108 |
| H  | -6.100129  | -3.801842  | 4.206392  |
| H  | -8.466229  | -9.638242  | 3.825392  |
| H  | -4.011929  | 0.981958   | 2.270392  |
| H  | -5.768629  | -3.409142  | 1.120292  |
| H  | -8.792329  | -11.626442 | -6.416608 |
| H  | -1.350629  | -0.867442  | -1.498008 |
| H  | -10.641829 | -9.857342  | -6.916608 |
| H  | -10.524829 | -5.095742  | -7.955208 |
| H  | -11.922429 | -9.117042  | -8.804308 |
| H  | -8.283429  | -8.912842  | -7.755908 |
| H  | -11.407129 | -4.309942  | -5.605608 |
| S  | -7.594429  | 0.600258   | 0.995692  |
| C  | -8.211929  | 0.845458   | 2.691392  |
| H  | -7.759629  | 1.768158   | 3.104992  |
| H  | -7.986929  | -0.021242  | 3.328192  |
| H  | -9.304029  | 1.011858   | 2.619992  |
| S  | -9.918929  | -1.823842  | -0.948308 |
| C  | -10.147229 | -0.414342  | -2.065908 |
| H  | -9.349329  | -0.407942  | -2.826908 |
| H  | -11.133829 | -0.508842  | -2.556408 |
| H  | -10.113729 | 0.505558   | -1.456008 |
| Cu | -7.946858  | -1.641716  | 0.335189  |
| O  | -6.352405  | -2.287050  | -1.004088 |
| H  | -6.636905  | -2.445350  | -1.936888 |
| H  | -5.516005  | -1.751150  | -1.097088 |
| O  | -13.860800 | -5.767300  | -2.970700 |
| H  | -14.672900 | -6.295900  | -2.927200 |
| H  | -14.161800 | -4.838000  | -2.902500 |
| O  | -14.368300 | -2.741100  | -2.850900 |

|   |            |           |           |
|---|------------|-----------|-----------|
| H | -14.917400 | -2.375900 | -2.137900 |
| H | -14.734900 | -2.339800 | -3.656700 |
| O | -7.891000  | -5.860600 | 6.786400  |
| H | -8.610300  | -6.174800 | 7.359800  |
| H | -7.281900  | -5.428500 | 7.407000  |
| O | -12.873945 | -4.742629 | 0.843963  |
| H | -11.913945 | -4.742629 | 0.843963  |
| H | -13.194399 | -3.837693 | 0.843963  |
| O | -13.354508 | -4.632216 | 3.870892  |
| H | -13.876880 | -5.371356 | 3.550892  |
| H | -13.354508 | -4.632216 | 4.830892  |

### 1N1O2Sb

|   |           |           |           |
|---|-----------|-----------|-----------|
| C | 0.000000  | 0.000000  | 0.000000  |
| O | 0.000000  | 0.000000  | 1.234600  |
| N | 1.121000  | 0.000000  | -0.762600 |
| C | 2.472300  | -0.038100 | -0.179400 |
| H | 1.061200  | -0.070500 | -1.776400 |
| C | 3.440200  | 0.581900  | -1.191600 |
| O | 3.346100  | 0.332700  | -2.406600 |
| N | 4.406200  | 1.369500  | -0.682400 |
| H | 5.124800  | 1.736700  | -1.301100 |
| H | 4.495900  | 1.552500  | 0.315100  |
| C | -1.337800 | 0.045800  | -0.787600 |
| N | -2.265000 | -0.877400 | -0.086800 |
| C | -3.282700 | -1.590700 | -0.632400 |
| O | -3.815400 | -2.552800 | -0.067000 |
| H | -1.996500 | -1.114200 | 0.870200  |
| C | 2.911500  | -1.493500 | 0.142800  |
| C | -3.812300 | -1.149000 | -2.010200 |
| N | -3.768100 | -2.318400 | -2.904900 |
| C | -3.606719 | -2.104314 | -4.226238 |
| O | -3.412953 | -0.834826 | -4.673960 |
| H | -3.964700 | -3.226800 | -2.495200 |
| C | -3.709300 | -3.263500 | -5.244800 |
| N | -2.398000 | -3.540600 | -5.864000 |
| C | -1.471300 | -2.888100 | -6.650300 |
| O | -0.579900 | -3.608200 | -7.121000 |
| H | -2.085200 | -4.506400 | -5.761400 |
| C | -1.441800 | -1.354300 | -6.956400 |
| N | -0.073800 | -1.151300 | -7.496700 |
| C | 0.671200  | -0.039400 | -7.328400 |
| O | 0.261800  | 1.008200  | -6.801100 |
| H | 0.347900  | -1.980900 | -7.914200 |
| C | 2.098300  | -0.122900 | -7.916700 |



|   |           |           |            |
|---|-----------|-----------|------------|
| N | 2.124900  | 0.788500  | -9.077900  |
| C | 2.678400  | 0.439100  | -10.273800 |
| O | 3.187300  | -0.673000 | -10.475300 |
| H | 1.831300  | 1.747700  | -8.921100  |
| C | 3.166900  | 0.247600  | -6.828800  |
| C | 4.062300  | -0.927200 | -6.448100  |
| O | 4.519800  | -1.728000 | -7.286900  |
| N | 4.368700  | -1.011200 | -5.142200  |
| H | 4.993800  | -1.748300 | -4.828100  |
| H | 3.988800  | -0.381600 | -4.430400  |
| C | 2.616500  | 1.565500  | -11.348900 |
| N | 3.721500  | 1.399700  | -12.285800 |
| C | 4.972600  | 1.859800  | -11.987900 |
| O | 5.198400  | 2.681800  | -11.091900 |
| H | 3.599800  | 0.713500  | -13.024400 |
| C | 6.077000  | 1.147500  | -12.778600 |
| N | 7.308500  | 1.932900  | -12.791500 |
| C | 8.115000  | 1.973100  | -13.907100 |
| O | 7.909100  | 1.251400  | -14.885600 |
| C | 9.264900  | 2.950000  | -13.802400 |
| H | 7.417200  | 2.611100  | -12.041900 |
| C | -4.281200 | -4.608200 | -4.687900  |
| C | -4.833300 | -5.544100 | -5.811500  |
| C | -5.017900 | -6.990500 | -5.275200  |
| C | -5.597400 | -8.017200 | -6.268100  |
| N | -7.054200 | -7.719900 | -6.637200  |
| H | -7.123900 | -7.032900 | -7.403300  |
| H | -7.578000 | -7.357100 | -5.822600  |
| H | -7.525600 | -8.584600 | -6.956500  |
| C | -1.904100 | 1.490900  | -0.805100  |
| C | -1.178300 | 2.450700  | -1.776300  |
| C | 1.257500  | 1.586600  | -12.095200 |
| O | 1.200400  | 0.360600  | -12.842000 |
| H | 0.521400  | 0.473700  | -13.527600 |
| C | 1.136900  | 2.830500  | -12.995000 |
| C | 6.227700  | -0.219100 | -12.028000 |
| C | 7.477100  | -1.066500 | -12.348800 |
| C | 7.378600  | -2.473900 | -11.699800 |
| C | 7.091300  | -2.459300 | -10.180200 |
| N | 5.601600  | -2.466700 | -9.879300  |
| H | 5.195400  | -3.367500 | -10.163000 |
| H | 5.388600  | -2.331400 | -8.864000  |
| H | 5.076200  | -1.724300 | -10.380300 |
| C | -2.493400 | -0.880200 | -8.020800  |
| C | -3.791700 | -0.136000 | -7.580500  |
| C | -5.289400 | -0.617200 | -1.916100  |

|   |           |           |            |
|---|-----------|-----------|------------|
| C | -5.472500 | 0.870800  | -2.116900  |
| C | -6.365300 | 1.651900  | -1.425700  |
| N | -6.272600 | 2.914400  | -1.957000  |
| C | -5.341300 | 2.890900  | -2.934200  |
| N | -4.828400 | 1.669700  | -3.069600  |
| H | -6.815100 | 3.722700  | -1.665300  |
| H | -5.086500 | 3.765100  | -3.524000  |
| H | -7.033600 | 1.409800  | -0.602400  |
| H | -4.459200 | -0.758300 | -6.965900  |
| H | 1.913800  | 2.834600  | -13.776200 |
| H | 10.221400 | 2.398100  | -13.863700 |
| H | 9.263900  | 3.564500  | -12.882800 |
| H | 9.238200  | 3.617600  | -14.681700 |
| H | 2.285200  | -1.883100 | 0.966300   |
| H | -5.588600 | -9.022100 | -5.802600  |
| H | -1.947600 | -0.246800 | -8.745100  |
| H | -2.966100 | 1.472500  | -1.106600  |
| H | -1.859100 | 1.920300  | 0.214900   |
| H | 1.238100  | 3.759800  | -12.394600 |
| H | 7.506700  | -3.354800 | -9.676800  |
| H | 3.965200  | -1.504400 | 0.486800   |
| H | -1.678600 | 3.442000  | -1.770000  |
| H | -5.890900 | -1.129400 | -2.695600  |
| H | -5.031800 | -8.055300 | -7.218100  |
| H | -0.122700 | 2.616000  | -1.483100  |
| H | 0.139300  | 2.858600  | -13.480500 |
| H | 7.527000  | -1.565300 | -9.695200  |
| H | 8.347600  | -2.999500 | -11.841800 |
| H | -5.735200 | -0.907200 | -0.941200  |
| H | 7.565100  | -1.180700 | -13.448000 |
| H | -4.351100 | 0.110800  | -8.514400  |
| H | 8.384700  | -0.535800 | -11.995400 |
| H | 3.831200  | 1.042500  | -7.232400  |
| H | 2.813400  | -2.133600 | -0.750300  |
| H | -4.016600 | -7.398300 | -5.012700  |
| H | -2.851900 | -1.747100 | -8.622900  |
| H | -5.136600 | -4.368500 | -4.016600  |
| H | -4.415300 | -2.868800 | -6.007000  |
| H | 6.234300  | 0.036600  | -10.948000 |
| H | -1.164700 | -0.326400 | -1.817100  |
| H | -4.143700 | -5.558300 | -6.683800  |
| H | 2.759200  | 2.544800  | -10.838900 |
| H | -5.613400 | -7.005100 | -4.334100  |
| H | 2.682800  | 0.702200  | -5.937500  |
| H | -3.501400 | -5.122200 | -4.088200  |
| H | 5.319900  | -0.813700 | -12.268500 |

|    |           |           |            |
|----|-----------|-----------|------------|
| H  | 6.610600  | -3.081100 | -12.228500 |
| H  | 2.449000  | 0.530200  | 0.773400   |
| H  | -1.537700 | -0.756500 | -6.036000  |
| H  | -5.804400 | -5.099200 | -6.134100  |
| H  | -3.193300 | -0.366000 | -2.464800  |
| H  | 5.790600  | 0.934100  | -13.828400 |
| H  | 0.438700  | 1.616700  | -11.337600 |
| H  | 2.336300  | -1.121000 | -8.319100  |
| S  | -3.752385 | 1.439019  | -6.629883  |
| C  | -2.678285 | 2.527819  | -7.614383  |
| H  | -1.631885 | 2.207619  | -7.531483  |
| H  | -2.810785 | 3.550919  | -7.210683  |
| H  | -3.022185 | 2.528419  | -8.670183  |
| S  | -1.112198 | 1.824491  | -3.486958  |
| C  | -0.407598 | 3.254091  | -4.362658  |
| Cu | -3.217200 | 1.340000  | -4.333500  |
| H  | -0.108398 | 2.884391  | -5.355358  |
| H  | -1.148298 | 4.072491  | -4.438958  |
| H  | 0.479602  | 3.606391  | -3.803458  |
| O  | 0.983404  | 3.741630  | -9.040324  |
| H  | 1.943404  | 3.741630  | -9.040324  |
| H  | 0.662949  | 4.646566  | -9.040324  |
| O  | 1.731628  | -4.628745 | -5.770722  |
| H  | 2.632928  | -4.711563 | -6.090722  |
| O  | 1.286875  | -3.611319 | -9.943339  |
| H  | 0.907947  | -2.789362 | -10.263339 |
| O  | -2.423893 | 0.610865  | -11.991824 |
| O  | 6.376276  | 1.465420  | -7.508910  |
| H  | 7.277576  | 1.382602  | -7.828910  |
| O  | 0.448881  | -4.853343 | -2.388378  |
| H  | 0.069953  | -4.031385 | -2.708378  |
| H  | 1.286875  | -3.611319 | -8.983339  |
| H  | 1.731628  | -4.628745 | -4.810722  |
| H  | 0.448881  | -4.853343 | -1.428378  |
| H  | 5.853904  | 0.726280  | -7.828910  |
| H  | -3.130520 | 0.997143  | -12.514382 |
| H  | -2.511734 | -0.345108 | -11.991824 |

### 3N1S<sub>M109a</sub>

|   |           |           |           |
|---|-----------|-----------|-----------|
| C | 0.000000  | 0.000000  | 0.000000  |
| O | 0.000000  | 0.000000  | 1.234200  |
| N | 1.147000  | 0.000000  | -0.727300 |
| H | 1.155900  | -0.025100 | -1.742600 |
| H | 2.033200  | 0.017700  | -0.230500 |
| C | -1.298400 | 0.051600  | -0.818900 |

|   |           |           |           |
|---|-----------|-----------|-----------|
| N | -2.273600 | -0.837500 | -0.188700 |
| C | -3.276300 | -1.435100 | -0.879200 |
| O | -3.475400 | -1.265000 | -2.090600 |
| H | -2.206000 | -0.966400 | 0.821200  |
| C | -4.166000 | -2.358400 | 0.006200  |
| N | -5.115400 | -1.544700 | 0.791700  |
| C | -4.806600 | -1.023800 | 2.005400  |
| O | -3.683100 | -1.127600 | 2.518700  |
| H | -6.059900 | -1.421800 | 0.435900  |
| C | -4.935600 | -3.386800 | -0.846200 |
| C | -5.971900 | -0.324100 | 2.742300  |
| N | -6.224008 | -1.130092 | 3.933001  |
| C | -7.178400 | -1.989800 | 3.974200  |
| O | -7.981800 | -2.263600 | 2.940500  |
| H | -8.658700 | -2.993300 | 3.218800  |
| C | -7.406500 | -2.765500 | 5.266900  |
| N | -6.264634 | -2.574667 | 6.179720  |
| C | -5.507200 | -3.648700 | 6.388300  |
| O | -5.748600 | -4.850900 | 6.055700  |
| C | -5.496300 | -4.564600 | -0.011400 |
| C | -1.810200 | 1.518400  | -0.889100 |
| H | -2.093200 | 1.864600  | 0.120700  |
| H | -2.681700 | 1.555600  | -1.567700 |
| H | -6.154000 | -4.204500 | 0.806500  |
| H | -3.511700 | -2.877400 | 0.738100  |
| H | -4.275700 | -3.738200 | -1.663600 |
| C | -4.163500 | -3.287100 | 7.062700  |
| N | -3.702900 | -4.270900 | 8.065900  |
| C | -3.045700 | -5.453200 | 7.894400  |
| O | -2.512800 | -5.868900 | 6.865500  |
| H | -4.064600 | -4.086000 | 9.001900  |
| C | -3.116800 | -2.930900 | 5.958300  |
| C | -2.264100 | -1.727900 | 6.398600  |
| H | -2.473500 | -3.799800 | 5.726000  |
| C | -3.022900 | -6.281700 | 9.218500  |
| N | -4.418900 | -6.518800 | 9.633000  |
| C | -4.866300 | -6.301600 | 10.885400 |
| O | -4.140100 | -5.919200 | 11.823500 |
| H | -5.071100 | -6.853400 | 8.915100  |
| C | -6.396400 | -6.474400 | 11.032000 |
| N | -6.718300 | -6.852000 | 12.418100 |
| C | -6.451900 | -8.115400 | 12.847400 |
| O | -6.253800 | -9.057200 | 12.073600 |
| H | -6.816300 | -6.081600 | 13.079100 |
| H | -2.565500 | -5.669300 | 10.019300 |
| C | -6.412900 | -8.282100 | 14.394100 |

|   |           |            |           |
|---|-----------|------------|-----------|
| N | -6.091900 | -9.680400  | 14.717400 |
| C | -4.988400 | -10.370200 | 14.339100 |
| O | -3.934500 | -9.848900  | 13.924600 |
| H | -6.891500 | -10.243700 | 14.988500 |
| C | -5.100800 | -11.865800 | 14.492100 |
| H | -4.201700 | -12.241200 | 15.010500 |
| H | -6.002000 | -12.210700 | 15.031900 |
| H | -5.105500 | -12.312900 | 13.479500 |
| H | -4.374900 | -2.376600  | 7.651800  |
| H | -3.644200 | -2.648600  | 5.025300  |
| H | -1.017800 | 2.177700   | -1.298300 |
| C | -2.252200 | -7.618400  | 9.029700  |
| C | -2.064300 | -8.313800  | 10.359200 |
| O | -1.243800 | -7.918600  | 11.210600 |
| N | -2.873400 | -9.377700  | 10.558100 |
| H | -3.629200 | -9.571100  | 9.904700  |
| H | -2.915700 | -9.848800  | 11.460600 |
| H | -1.134100 | -0.306900  | -1.857600 |
| H | -6.745200 | -7.293300  | 10.366800 |
| C | -5.543700 | 1.127500   | 3.157600  |
| C | -6.387200 | 1.699400   | 4.262300  |
| C | -7.288700 | 2.737000   | 4.222400  |
| N | -7.802100 | 2.846600   | 5.497100  |
| C | -7.233400 | 1.883900   | 6.263000  |
| N | -6.356800 | 1.183800   | 5.556800  |
| H | -8.533400 | 3.485400   | 5.794100  |
| H | -7.502400 | 1.723400   | 7.302400  |
| H | -7.588300 | 3.397200   | 3.411100  |
| H | -4.483000 | 1.095000   | 3.473700  |
| H | -1.255300 | -7.376800  | 8.602300  |
| H | -2.794100 | -8.238700  | 8.280600  |
| H | -7.455700 | -3.833900  | 4.986800  |
| H | -1.746500 | -1.905000  | 7.363000  |
| H | -5.785400 | -2.886100  | -1.365300 |
| H | -7.448500 | -8.116400  | 14.767900 |
| H | -6.111500 | -5.227000  | -0.661700 |
| H | -5.630300 | 1.779200   | 2.254700  |
| H | -6.875800 | -0.254400  | 2.096600  |
| H | -1.511100 | -1.458600  | 5.627300  |
| C | -7.107200 | -5.149900  | 10.620200 |
| O | -6.917900 | -4.230200  | 11.717700 |
| H | -7.231900 | -3.366100  | 11.391800 |
| C | -8.600200 | -5.372500  | 10.309300 |
| H | -9.118000 | -5.801300  | 11.189100 |
| H | -9.083400 | -4.408900  | 10.044400 |
| H | -8.720100 | -6.065000  | 9.446000  |

|    |            |           |           |
|----|------------|-----------|-----------|
| H  | -6.582400  | -4.757800 | 9.724100  |
| C  | -8.739000  | -2.269400 | 5.917600  |
| H  | -8.472400  | -1.443500 | 6.606500  |
| H  | -9.420700  | -1.819100 | 5.165000  |
| C  | -9.502000  | -3.409000 | 6.670600  |
| C  | -10.609200 | -4.107900 | 5.823500  |
| C  | -10.152900 | -5.007800 | 4.645500  |
| N  | -9.774300  | -4.270600 | 3.403000  |
| H  | -10.633900 | -3.951600 | 2.941200  |
| H  | -9.338500  | -4.955400 | 2.770800  |
| H  | -8.783800  | -4.172100 | 7.042800  |
| H  | -9.280100  | -5.614900 | 4.956700  |
| H  | -11.330000 | -3.346500 | 5.460200  |
| H  | -10.979400 | -5.719300 | 4.432700  |
| H  | -10.024900 | -2.971200 | 7.547900  |
| H  | -11.175100 | -4.782100 | 6.505700  |
| S  | -3.326294  | -0.230316 | 6.635216  |
| S  | -4.251500  | -5.591200 | 0.845200  |
| C  | -3.263200  | -6.261800 | -0.524900 |
| H  | -2.666900  | -5.472900 | -1.008600 |
| H  | -3.916300  | -6.769900 | -1.260400 |
| H  | -2.573200  | -7.003800 | -0.076500 |
| C  | -2.497894  | 0.975584  | 5.552316  |
| H  | -2.381494  | 0.533584  | 4.548416  |
| H  | -3.159694  | 1.858584  | 5.502016  |
| H  | -1.522794  | 1.254784  | 5.994816  |
| C  | -5.498200  | -7.149700 | 15.016300 |
| H  | -4.998900  | -6.643800 | 14.172400 |
| H  | -6.176400  | -6.396300 | 15.464100 |
| C  | -4.443600  | -7.496800 | 16.119400 |
| H  | -4.148800  | -8.559300 | 16.072800 |
| C  | -3.208300  | -6.559800 | 15.984200 |
| C  | -2.046600  | -7.093200 | 15.113400 |
| N  | -2.476900  | -7.454500 | 13.714900 |
| H  | -2.994100  | -6.698300 | 13.230600 |
| H  | -1.673800  | -7.672200 | 13.088600 |
| H  | -3.058100  | -8.320800 | 13.742500 |
| H  | -1.592400  | -8.001100 | 15.549600 |
| H  | -1.257900  | -6.318500 | 15.036400 |
| H  | -4.909800  | -7.336000 | 17.114400 |
| H  | -3.525300  | -5.569400 | 15.593000 |
| H  | -2.756300  | -6.364500 | 16.981400 |
| Cu | -5.412451  | -0.684912 | 5.817992  |
| H  | -6.210500  | -6.693400 | 3.077300  |
| O  | -6.853900  | -6.490400 | 3.778000  |
| H  | -6.352900  | -5.933200 | 4.407800  |

|   |            |           |           |
|---|------------|-----------|-----------|
| O | -4.328600  | -1.007600 | 10.040400 |
| H | -4.024200  | -0.589300 | 10.859800 |
| H | -3.913600  | -0.484100 | 9.327600  |
| O | -11.521100 | -0.432200 | 7.275600  |
| H | -10.832100 | -0.102400 | 7.885500  |
| H | -12.322800 | 0.042200  | 7.545400  |
| H | -6.339900  | -6.316300 | 7.059000  |
| O | -6.605600  | -7.077900 | 7.635400  |
| H | -6.815900  | -7.783100 | 7.003800  |
| O | -7.253000  | -1.762500 | 9.672900  |
| H | -7.297300  | -2.176100 | 8.787500  |
| H | -6.318000  | -1.476400 | 9.747400  |
| H | -8.499700  | -0.104600 | 9.411900  |
| O | -9.072800  | 0.655400  | 9.173100  |
| H | -9.261700  | 1.093500  | 10.015600 |

### 3N1S<sub>M109c</sub>

|   |           |           |           |
|---|-----------|-----------|-----------|
| C | 0.000000  | 0.000000  | 0.000000  |
| O | 0.000000  | 0.000000  | 1.241100  |
| N | 1.115700  | 0.000000  | -0.769700 |
| C | 2.441300  | -0.180200 | -0.178700 |
| H | 1.021300  | 0.065100  | -1.785400 |
| C | -1.317600 | 0.068600  | -0.785200 |
| N | -2.315100 | -0.645000 | 0.017300  |
| C | -3.381200 | -1.290000 | -0.525000 |
| O | -3.627000 | -1.283900 | -1.737900 |
| H | -2.189600 | -0.580400 | 1.026500  |
| C | 3.369200  | 1.015800  | -0.459600 |
| O | 3.324300  | 1.698200  | -1.479900 |
| N | 4.275400  | 1.256800  | 0.556800  |
| H | 4.433100  | 0.505900  | 1.241200  |
| H | 5.093800  | 1.791600  | 0.273100  |
| C | -4.233800 | -2.154900 | 0.431000  |
| N | -3.463200 | -3.383100 | 0.692700  |
| C | -4.067800 | -4.540800 | 1.057600  |
| O | -5.294300 | -4.637400 | 1.213700  |
| H | -2.452500 | -3.323800 | 0.720500  |
| C | -3.081700 | -5.711900 | 1.299200  |
| N | -2.231777 | -5.318306 | 2.453455  |
| C | -1.201400 | -6.016500 | 2.796900  |
| O | -0.699400 | -7.114800 | 2.231600  |
| H | -1.148900 | -7.428400 | 1.381300  |
| C | -0.407000 | -5.608800 | 4.032600  |
| N | -0.228187 | -4.145110 | 4.159327  |
| C | 0.755413  | -3.708310 | 3.351627  |

|   |           |           |           |
|---|-----------|-----------|-----------|
| O | 1.290313  | -4.334610 | 2.391427  |
| C | -3.847100 | -7.035900 | 1.551100  |
| C | 3.088300  | -1.490100 | -0.708800 |
| H | 4.118600  | -1.613700 | -0.321900 |
| H | 2.482500  | -2.351900 | -0.360100 |
| H | -5.110700 | -2.456700 | -0.179300 |
| C | -1.011300 | -6.216300 | 5.332500  |
| C | -2.528400 | -6.076500 | 5.569000  |
| H | -3.106000 | -6.574900 | 4.765700  |
| H | -0.447500 | -5.790700 | 6.188300  |
| H | -3.172200 | -7.798500 | 1.985500  |
| H | -4.630800 | -6.849900 | 2.316700  |
| H | -1.217900 | -0.467800 | -1.751600 |
| H | 2.270100  | -0.269300 | 0.912800  |
| H | -2.813900 | -6.553600 | 6.531300  |
| H | -0.786100 | -7.305700 | 5.333900  |
| C | -4.565200 | -7.623200 | 0.300600  |
| C | -3.697900 | -7.977200 | -0.933500 |
| C | -2.579400 | -9.017000 | -0.672000 |
| N | -1.330700 | -8.392400 | -0.154900 |
| H | -0.870100 | -7.901700 | -0.926300 |
| H | -0.688800 | -9.149600 | 0.108800  |
| H | -5.363200 | -6.918000 | -0.004200 |
| H | -3.256700 | -7.081200 | -1.410900 |
| H | -2.385000 | -9.570400 | -1.614100 |
| H | -2.931200 | -9.760300 | 0.074600  |
| H | -5.095900 | -8.547700 | 0.629900  |
| H | 3.122700  | -1.496500 | -1.818300 |
| H | -2.424200 | -5.789900 | 0.402500  |
| H | 0.573500  | -6.114700 | 3.899500  |
| H | -4.387400 | -8.403400 | -1.700700 |
| C | -1.705200 | 1.553500  | -1.102300 |
| C | -2.062300 | 1.706600  | -2.600000 |
| H | -2.582600 | 1.840900  | -0.489600 |
| H | -2.791000 | 0.927700  | -2.899000 |
| H | -0.889200 | 2.249500  | -0.822400 |
| H | -2.530700 | 2.699200  | -2.799100 |
| C | 1.392213  | -2.312910 | 3.696027  |
| N | 1.155313  | -1.922810 | 5.112527  |
| C | 1.165713  | -0.655110 | 5.566427  |
| O | 1.194813  | 0.373890  | 4.852427  |
| H | 1.149213  | -2.697910 | 5.772327  |
| H | 0.961313  | -1.528810 | 3.041527  |
| C | 0.936413  | -0.522210 | 7.098827  |
| N | 1.703513  | 0.617790  | 7.624327  |
| C | 3.040413  | 0.666690  | 7.846927  |



|   |           |           |           |
|---|-----------|-----------|-----------|
| O | 3.775413  | -0.318710 | 7.934327  |
| H | 1.199813  | 1.498490  | 7.552327  |
| C | 3.563713  | 2.130290  | 8.016727  |
| N | 5.029413  | 2.130790  | 8.001927  |
| C | 5.819013  | 1.812790  | 6.951427  |
| O | 5.379913  | 1.617890  | 5.799427  |
| H | 5.479913  | 2.251790  | 8.901727  |
| C | 7.288013  | 1.700990  | 7.267927  |
| H | 7.859113  | 2.345390  | 6.574927  |
| H | 7.603913  | 0.660090  | 7.069127  |
| H | 7.559513  | 1.958790  | 8.308827  |
| H | 1.223013  | -1.463810 | 7.618127  |
| H | 3.265013  | 2.464090  | 9.036927  |
| C | -0.582987 | -0.203910 | 7.332727  |
| O | -0.884987 | 1.112890  | 6.789027  |
| H | -0.419887 | 1.147390  | 5.927427  |
| C | -0.969387 | -0.220110 | 8.816727  |
| H | -0.405087 | 0.533290  | 9.397227  |
| H | -2.052087 | -0.010610 | 8.911127  |
| H | -1.199487 | -0.963210 | 6.814027  |
| H | -0.760087 | -1.226510 | 9.241927  |
| C | -4.832500 | -1.485700 | 1.710000  |
| C | -3.903300 | -0.980100 | 2.786000  |
| C | -4.059500 | 0.178800  | 3.508700  |
| N | -3.000400 | 0.238400  | 4.380200  |
| C | -2.214200 | -0.831200 | 4.152800  |
| N | -2.743583 | -1.618285 | 3.220393  |
| H | -2.854900 | 0.922600  | 5.119800  |
| H | -1.274900 | -1.025900 | 4.658600  |
| H | -4.829800 | 0.949600  | 3.470200  |
| H | -5.545500 | -2.204500 | 2.156900  |
| H | -5.449000 | -0.629100 | 1.352800  |
| C | 2.929413  | -2.489410 | 3.413427  |
| C | 3.774913  | -1.301710 | 3.802027  |
| O | 3.995213  | -0.351710 | 3.012027  |
| N | 4.267713  | -1.344410 | 5.048327  |
| H | 3.963313  | -2.069110 | 5.700727  |
| H | 4.721313  | -0.523510 | 5.454327  |
| H | 3.022913  | -2.681510 | 2.330927  |
| H | 3.284813  | -3.396710 | 3.945627  |
| S | -0.664300 | 1.497700  | -3.757800 |
| C | 0.280200  | 3.035200  | -3.517400 |
| H | 0.725300  | 3.077200  | -2.511100 |
| H | -0.377400 | 3.904800  | -3.707900 |
| H | 1.096200  | 3.019200  | -4.265000 |
| C | 2.839513  | 3.065390  | 6.969527  |

|    |           |           |          |
|----|-----------|-----------|----------|
| H  | 2.440413  | 2.405190  | 6.184327 |
| C  | 3.594713  | 4.250090  | 6.291327 |
| H  | 4.652513  | 3.997290  | 6.106827 |
| C  | 2.850813  | 4.601590  | 4.972027 |
| C  | 3.436013  | 3.986290  | 3.683327 |
| N  | 3.533013  | 2.478890  | 3.688527 |
| H  | 2.665113  | 1.988790  | 3.958727 |
| H  | 3.752513  | 2.135590  | 2.729927 |
| H  | 4.300013  | 2.147190  | 4.304227 |
| H  | 4.457513  | 4.359890  | 3.484327 |
| H  | 2.794513  | 4.274890  | 2.828027 |
| H  | 1.778913  | 4.322590  | 5.054527 |
| H  | 3.581313  | 5.129090  | 6.969727 |
| H  | 2.860513  | 5.698990  | 4.788127 |
| H  | 1.974413  | 3.530590  | 7.489627 |
| S  | -3.220700 | -4.387400 | 5.577100 |
| C  | -2.333200 | -3.614000 | 6.969700 |
| H  | -1.320600 | -3.332000 | 6.639900 |
| H  | -2.925900 | -2.735800 | 7.292500 |
| H  | -2.300900 | -4.334300 | 7.816600 |
| Cu | -2.210200 | -3.546800 | 3.617800 |
| O  | 3.145200  | -6.476800 | 6.134600 |
| H  | 3.837000  | -7.072300 | 6.460100 |
| H  | 3.251900  | -6.488800 | 5.156500 |
| H  | 2.714100  | -5.678200 | 2.758400 |
| O  | 3.403000  | -6.276600 | 3.130200 |
| H  | 3.361700  | -7.069100 | 2.574600 |
| O  | -4.474300 | -0.091500 | 7.452600 |
| H  | -4.975900 | 0.360800  | 8.149700 |
| H  | -5.119200 | -0.738000 | 7.091500 |
| O  | -6.265100 | -2.308300 | 6.449200 |
| H  | -5.792900 | -3.151700 | 6.565600 |
| H  | -6.668100 | -2.415900 | 5.567800 |
| H  | 3.406100  | -3.545600 | 7.850700 |
| O  | 3.033500  | -3.680500 | 6.965700 |
| H  | 3.136300  | -4.643600 | 6.786300 |
| O  | -7.311600 | -3.765500 | 3.556800 |
| H  | -8.212700 | -4.077800 | 3.387100 |
| H  | -6.787600 | -4.134200 | 2.820100 |

2N1O1S<sub>M109a</sub>

|   |          |          |           |
|---|----------|----------|-----------|
| C | 0.000000 | 0.000000 | 0.000000  |
| O | 0.000000 | 0.000000 | 1.240200  |
| N | 1.101000 | 0.000000 | -0.779300 |
| C | 2.478200 | 0.104700 | -0.239600 |

|   |           |           |           |
|---|-----------|-----------|-----------|
| H | 1.025000  | 0.124400  | -1.790400 |
| C | 3.142786  | 1.265152  | -0.973724 |
| O | 2.861286  | 1.438353  | -2.207824 |
| N | 3.956494  | 2.002009  | -0.240701 |
| C | 4.799544  | 3.134571  | -0.672427 |
| C | 3.875800  | 4.366100  | -0.632000 |
| O | 3.311000  | 4.892900  | -1.615100 |
| N | 3.653300  | 4.966700  | 0.578900  |
| C | 3.840500  | 4.599300  | 2.010600  |
| H | 3.081300  | 5.805500  | 0.462500  |
| C | 5.309000  | 4.246600  | 2.369600  |
| O | 5.712393  | 2.945776  | 2.166946  |
| N | 5.988800  | 5.282100  | 2.893300  |
| C | 7.394800  | 5.191900  | 3.303800  |
| H | 5.563000  | 6.198200  | 3.015300  |
| C | 7.654100  | 6.349600  | 4.300500  |
| O | 6.935700  | 7.361900  | 4.322500  |
| N | 8.722300  | 6.149200  | 5.094400  |
| C | 9.271600  | 7.151600  | 6.015600  |
| H | 9.288700  | 5.302300  | 5.014100  |
| C | 8.642500  | 7.014500  | 7.427400  |
| C | 10.788900 | 6.898800  | 6.071900  |
| O | 11.252300 | 5.764500  | 5.910700  |
| N | 11.565200 | 7.973600  | 6.336600  |
| H | 11.192700 | 8.910000  | 6.475600  |
| H | 12.564500 | 7.829500  | 6.450900  |
| C | 8.360900  | 5.240500  | 2.083700  |
| C | 8.383000  | 6.601600  | 1.356600  |
| C | 3.247700  | -1.236500 | -0.473800 |
| C | 3.868300  | -1.833400 | 0.812400  |
| C | -1.336200 | 0.048700  | -0.777900 |
| N | -2.317200 | -0.745600 | -0.019200 |
| C | -3.209900 | -1.600900 | -0.564800 |
| O | -3.280800 | -1.850900 | -1.783000 |
| C | -4.100500 | -2.316600 | 0.476800  |
| N | -5.432600 | -2.536900 | -0.086200 |
| C | -6.319600 | -1.515400 | -0.222600 |
| O | -6.161700 | -0.421900 | 0.327800  |
| H | -5.574100 | -3.426300 | -0.559900 |
| H | -2.271500 | -0.637100 | 0.992100  |
| C | -7.537800 | -1.843300 | -1.130400 |
| N | -8.383300 | -0.648600 | -1.255600 |
| C | -8.027300 | 0.553500  | -1.758600 |
| O | -6.983400 | 0.761200  | -2.413900 |
| C | -9.008400 | 1.663900  | -1.493100 |
| H | -9.247300 | -0.677800 | -0.723800 |

|   |           |           |           |
|---|-----------|-----------|-----------|
| C | 2.722200  | 3.593900  | 2.442300  |
| C | 3.061585  | 2.781221  | 3.626437  |
| C | 2.844885  | 3.003421  | 4.962537  |
| N | 3.401085  | 1.925821  | 5.615837  |
| C | 3.933885  | 1.092921  | 4.687937  |
| N | 3.744185  | 1.585321  | 3.471037  |
| H | 3.395485  | 1.769021  | 6.618037  |
| C | -1.790800 | 1.539700  | -0.886500 |
| C | -2.997700 | 1.677100  | -1.803400 |
| O | -2.922500 | 1.465800  | -3.027400 |
| N | -4.131600 | 2.053600  | -1.181400 |
| H | -4.185500 | 2.045700  | -0.165000 |
| H | -5.020600 | 2.062000  | -1.679100 |
| C | 5.664444  | 2.783271  | -1.934427 |
| C | 6.411944  | 3.921671  | -2.688727 |
| C | 5.642744  | 4.701471  | -3.785427 |
| C | 4.697744  | 3.877971  | -4.680927 |
| N | 3.406244  | 3.537771  | -3.975927 |
| H | 2.636744  | 3.498071  | -4.659027 |
| H | 3.203944  | 4.264371  | -3.244927 |
| C | -3.457100 | -3.678700 | 0.918500  |
| O | -3.718200 | -4.703500 | -0.059300 |
| H | -3.145700 | -4.517400 | -0.822700 |
| C | -4.033700 | -4.140300 | 2.260500  |
| H | 2.364285  | 3.826021  | 5.488437  |
| H | 4.429385  | 0.159021  | 4.931137  |
| C | -7.023600 | -2.530900 | -2.462200 |
| C | -7.589600 | -2.099000 | -3.855400 |
| C | -6.474400 | -2.209700 | -4.935700 |
| C | -5.659800 | -0.924300 | -5.204600 |
| N | -4.970700 | -0.385000 | -3.970900 |
| H | -4.386300 | -1.084500 | -3.483700 |
| H | -4.326800 | 0.396000  | -4.192800 |
| H | -5.686600 | 0.007200  | -3.315400 |
| H | -9.981500 | 1.333400  | -1.085900 |
| H | -9.180300 | 2.223500  | -2.428800 |
| H | 5.144144  | 2.113271  | -2.637027 |
| H | -3.576200 | -5.109600 | 2.539800  |
| H | -0.981900 | 2.136900  | -1.353700 |
| H | 6.855144  | 4.651071  | -1.973027 |
| H | -3.799500 | -3.394500 | 3.047200  |
| H | 8.756000  | 5.978200  | 7.788400  |
| H | 5.155944  | 2.947271  | -5.061027 |
| H | 4.434744  | 4.503271  | -5.556827 |
| H | 7.570300  | 7.279900  | 7.368400  |
| H | 2.385500  | 0.293400  | 0.849400  |

|    |           |           |           |
|----|-----------|-----------|-----------|
| H  | -5.127400 | -4.275200 | 2.207600  |
| H  | 9.130700  | 7.704800  | 8.142900  |
| H  | -4.880200 | -1.133200 | -5.964100 |
| H  | -8.417600 | -2.787000 | -4.126400 |
| H  | -6.913900 | -2.477800 | -5.921400 |
| H  | 1.801700  | 4.197800  | 2.604600  |
| H  | 8.046900  | 4.443000  | 1.378800  |
| H  | -5.924000 | -2.435800 | -2.465700 |
| H  | -8.549200 | 2.367300  | -0.771600 |
| H  | 5.077544  | 5.549071  | -3.355927 |
| H  | -1.978800 | 1.938200  | 0.135700  |
| H  | -8.016800 | -1.082000 | -3.825400 |
| H  | 3.398244  | 2.637671  | -3.422427 |
| H  | -6.300000 | -0.108600 | -5.585900 |
| H  | 4.202000  | -2.881300 | 0.635400  |
| H  | 3.134600  | -1.864000 | 1.646000  |
| H  | -7.234100 | -3.616000 | -2.369800 |
| H  | 6.471744  | 2.156371  | -1.487827 |
| H  | 7.368600  | 7.019600  | 1.205100  |
| H  | 8.994500  | 7.338200  | 1.917400  |
| S  | 9.143200  | 6.357500  | -0.293700 |
| C  | 9.344700  | 8.077100  | -0.839600 |
| H  | 9.794600  | 8.052300  | -1.848700 |
| H  | 10.017300 | 8.616400  | -0.150400 |
| H  | 8.366000  | 8.584500  | -0.890100 |
| H  | 2.525900  | -1.983900 | -0.865400 |
| H  | -8.157100 | -2.592800 | -0.589000 |
| H  | 3.614300  | 5.549600  | 2.542900  |
| H  | 9.391000  | 4.985400  | 2.410500  |
| H  | 2.530600  | 2.872500  | 1.624600  |
| H  | -5.777400 | -3.037300 | -4.683100 |
| H  | -4.213300 | -1.665000 | 1.367700  |
| H  | 7.554900  | 4.216100  | 3.808300  |
| H  | 4.012000  | -1.128600 | -1.273100 |
| H  | -1.248900 | -0.394100 | -1.787700 |
| H  | 6.396644  | 5.152071  | -4.467327 |
| S  | 5.326818  | -0.981223 | 1.507491  |
| C  | 6.518618  | -1.060323 | 0.139991  |
| H  | 7.501818  | -0.766123 | 0.555591  |
| Cu | 4.536900  | 1.195200  | 1.654500  |
| H  | 6.595718  | -2.104123 | -0.224309 |
| H  | 6.211018  | -0.373823 | -0.663209 |
| H  | -2.362700 | -3.528500 | 1.043000  |
| H  | 9.035400  | 8.161700  | 5.622200  |
| H  | 7.280944  | 3.433571  | -3.189227 |
| H  | 5.560444  | 3.312771  | 0.106773  |

|   |           |           |           |
|---|-----------|-----------|-----------|
| O | 8.706665  | 2.031655  | 3.953649  |
| H | 8.327737  | 2.853612  | 3.633649  |
| O | 6.640095  | -0.661695 | 6.639879  |
| H | 7.541394  | -0.744513 | 6.319879  |
| O | 3.541894  | -2.260566 | 5.123679  |
| H | 3.162966  | -1.438609 | 4.803679  |
| O | 0.926173  | -2.123464 | 2.696648  |
| H | 1.827473  | -2.206282 | 2.376648  |
| O | 4.874502  | 8.026476  | 0.308934  |
| H | 5.775802  | 7.943658  | -0.011066 |
| H | 4.495574  | 8.848433  | -0.011066 |
| O | 0.473182  | 5.001014  | -1.865051 |
| H | 0.094255  | 5.822971  | -2.185051 |
| H | 8.706665  | 2.031655  | 4.913649  |
| H | 6.117722  | -1.400835 | 6.319879  |
| H | 3.541894  | -2.260566 | 6.083679  |
| H | 0.926173  | -2.123464 | 3.656648  |
| H | -0.049190 | 4.261874  | -2.185051 |

2N1O1S<sub>M109b</sub>

|   |            |           |           |
|---|------------|-----------|-----------|
| C | 0.000000   | 0.000000  | 0.000000  |
| O | 0.000000   | 0.000000  | 1.234917  |
| N | 1.138811   | 0.000000  | -0.729637 |
| H | 2.024175   | 0.076114  | -0.236123 |
| H | 1.149018   | 0.032815  | -1.746354 |
| C | -1.320835  | 0.028235  | -0.796579 |
| N | -2.308173  | -0.669407 | 0.034235  |
| C | -3.377058  | -1.338979 | -0.424936 |
| O | -3.691661  | -1.381500 | -1.630393 |
| H | -2.099863  | -0.643210 | 1.032552  |
| C | -4.111360  | -2.124206 | 0.686815  |
| N | -5.504700  | -2.414131 | 0.337162  |
| C | -6.457136  | -1.447742 | 0.321863  |
| O | -6.188871  | -0.244153 | 0.480041  |
| H | -5.809095  | -3.379231 | 0.217706  |
| C | -7.906548  | -1.913034 | 0.119105  |
| N | -8.020461  | -3.171521 | -0.664487 |
| C | -8.519965  | -2.992644 | -1.889611 |
| O | -8.785813  | -1.892863 | -2.482855 |
| C | -8.764733  | -4.311236 | -2.661214 |
| N | -10.187891 | -4.727512 | -2.569304 |
| C | -11.019253 | -4.713720 | -1.501644 |
| O | -10.815144 | -4.137315 | -0.419527 |
| H | -10.582095 | -5.109210 | -3.426290 |
| C | -12.261240 | -5.612738 | -1.639821 |

|   |            |           |            |
|---|------------|-----------|------------|
| N | -12.888619 | -5.522914 | -2.970481  |
| C | -13.664555 | -4.444994 | -3.299963  |
| O | -13.836434 | -3.495786 | -2.535715  |
| H | -12.886588 | -6.340397 | -3.573673  |
| C | -1.756882  | 1.489335  | -1.080213  |
| C | -11.861658 | -7.083142 | -1.340876  |
| C | -11.087025 | -7.329594 | -0.015620  |
| H | -1.938827  | 2.017844  | -0.128531  |
| C | -14.275436 | -4.406612 | -4.730432  |
| N | -13.940218 | -3.085237 | -5.280597  |
| C | -14.851599 | -2.237419 | -5.812232  |
| O | -16.061001 | -2.506822 | -5.928590  |
| H | -12.976243 | -2.766667 | -5.179108  |
| C | -14.291950 | -0.851303 | -6.191174  |
| N | -14.931046 | -0.395552 | -7.428399  |
| C | -14.614034 | -0.922983 | -8.637625  |
| O | -13.617081 | -1.630734 | -8.817886  |
| H | -15.773900 | 0.163153  | -7.301412  |
| H | -15.372625 | -4.430705 | -4.604667  |
| C | -15.616415 | -0.554638 | -9.769758  |
| N | -15.238604 | -1.258654 | -11.002104 |
| C | -15.162874 | -2.593871 | -11.183799 |
| O | -15.621825 | -3.436766 | -10.382567 |
| H | -14.813414 | -0.676679 | -11.716230 |
| C | -14.492479 | -3.022725 | -12.460649 |
| H | -15.119984 | -3.782928 | -12.957426 |
| H | -14.286143 | -2.202585 | -13.172581 |
| C | -3.338687  | -3.433591 | 1.028999   |
| C | -2.726033  | -4.163414 | -0.193288  |
| H | -2.686940  | 1.481848  | -1.680677  |
| H | -13.533169 | -3.512639 | -12.203353 |
| H | -0.974170  | 2.026109  | -1.652672  |
| H | -11.517048 | -6.744467 | 0.822007   |
| H | -13.198357 | -0.918717 | -6.362421  |
| H | -3.472175  | -4.350379 | -0.993651  |
| H | -1.220307  | -0.510521 | -1.762011  |
| H | -8.420380  | -1.089833 | -0.420347  |
| H | -12.983065 | -5.246810 | -0.880737  |
| H | -4.039505  | -4.116756 | 1.551773   |
| H | -12.812763 | -7.649926 | -1.224302  |
| H | -1.890344  | -3.563038 | -0.613139  |
| H | -11.316397 | -7.533819 | -2.199528  |
| H | -2.522158  | -3.204091 | 1.746650   |
| H | -11.207753 | -8.402644 | 0.255028   |
| C | -8.396256  | -4.250371 | -4.175371  |
| H | -8.760958  | -3.298605 | -4.605253  |

|   |            |           |           |
|---|------------|-----------|-----------|
| C | -6.890340  | -4.519566 | -4.474202 |
| C | -5.858227  | -3.570548 | -3.820890 |
| C | -5.868618  | -2.107652 | -4.350161 |
| N | -6.110007  | -1.148692 | -3.213263 |
| H | -6.012371  | -0.159792 | -3.491413 |
| H | -5.404361  | -1.316533 | -2.462674 |
| H | -7.086853  | -1.276914 | -2.854028 |
| H | -4.890407  | -1.847596 | -4.796996 |
| H | -6.654163  | -1.916776 | -5.107988 |
| H | -6.646980  | -5.542032 | -4.120937 |
| H | -5.971459  | -3.572473 | -2.715879 |
| H | -6.745000  | -4.517386 | -5.576540 |
| H | -8.142002  | -5.085917 | -2.160623 |
| H | -15.475577 | 0.527676  | -9.986505 |
| C | -13.821867 | -5.553653 | -5.690844 |
| C | -14.599962 | -5.486746 | -7.002067 |
| O | -15.778479 | -5.872806 | -7.069359 |
| N | -13.909442 | -5.003950 | -8.053747 |
| H | -13.034073 | -4.504150 | -7.902152 |
| H | -14.382285 | -4.809733 | -8.936339 |
| H | -14.112599 | -6.532188 | -5.254397 |
| H | -4.845824  | -3.993375 | -4.011423 |
| H | -12.721068 | -5.502441 | -5.857823 |
| H | -4.110968  | -1.476325 | 1.593200  |
| C | -8.616188  | -1.987138 | 1.511191  |
| C | -8.086622  | -2.996642 | 2.491050  |
| C | -7.595252  | -2.822032 | 3.758875  |
| N | -7.323514  | -4.083451 | 4.241057  |
| C | -7.626044  | -4.983194 | 3.275931  |
| N | -8.090073  | -4.357687 | 2.200336  |
| H | -6.944909  | -4.305082 | 5.156113  |
| H | -7.439601  | -1.923216 | 4.346117  |
| H | -7.460294  | -6.052632 | 3.377792  |
| H | -9.679737  | -2.234013 | 1.313986  |
| H | -8.566614  | -0.970670 | 1.960949  |
| H | -8.939797  | -5.068080 | -4.710080 |
| C | -14.577396 | 0.173930  | -5.031608 |
| O | -15.937990 | 0.653879  | -5.097809 |
| H | -16.503879 | -0.066001 | -4.770074 |
| C | -13.640248 | 1.381443  | -5.139763 |
| H | -13.753667 | 1.898239  | -6.109269 |
| H | -12.588389 | 1.053171  | -5.022384 |
| H | -13.883691 | 2.101142  | -4.331429 |
| H | -14.402784 | -0.330893 | -4.058078 |
| S | -2.040782  | -5.754130 | 0.390280  |
| C | -1.121918  | -6.315189 | -1.071855 |



|    |            |           |            |
|----|------------|-----------|------------|
| H  | -0.301106  | -5.608894 | -1.284282  |
| H  | -1.789087  | -6.396585 | -1.948846  |
| H  | -0.698788  | -7.308390 | -0.834136  |
| C  | -17.099146 | -0.736269 | -9.240728  |
| H  | -17.031633 | -1.253860 | -8.268903  |
| H  | -17.491862 | 0.277430  | -9.019252  |
| C  | -18.183932 | -1.433071 | -10.126771 |
| H  | -17.728781 | -2.099065 | -10.879709 |
| C  | -19.185511 | -2.208532 | -9.221389  |
| C  | -18.870022 | -3.702688 | -8.986097  |
| N  | -17.510608 | -3.933287 | -8.363159  |
| H  | -17.357415 | -3.394726 | -7.494885  |
| H  | -17.365235 | -4.924448 | -8.098532  |
| H  | -16.763248 | -3.709316 | -9.058756  |
| H  | -18.881831 | -4.276142 | -9.930697  |
| H  | -19.630056 | -4.139859 | -8.308501  |
| H  | -18.739263 | -0.650517 | -10.684318 |
| H  | -19.289532 | -1.698491 | -8.239817  |
| H  | -20.202605 | -2.201374 | -9.671280  |
| S  | -9.267119  | -7.044260 | 0.046837   |
| C  | -8.664267  | -7.875186 | -1.454677  |
| H  | -8.906278  | -7.305674 | -2.365997  |
| H  | -7.569712  | -7.963211 | -1.343923  |
| H  | -9.106032  | -8.894838 | -1.514010  |
| Cu | -8.603337  | -4.881556 | 0.325328   |
| H  | -7.499071  | -8.659982 | 2.107449   |
| O  | -6.655746  | -8.377813 | 2.501721   |
| H  | -6.338162  | -9.149839 | 2.994497   |
| O  | -6.198192  | 1.626442  | -2.227213  |
| H  | -6.330209  | 2.584428  | -2.272881  |
| H  | -6.289261  | 1.396290  | -1.282976  |
| H  | -4.374747  | -6.635306 | 0.276213   |
| O  | -5.343769  | -6.691478 | 0.151250   |
| H  | -5.654605  | -7.261607 | 0.879783   |
| H  | -10.519270 | -1.603282 | -3.605312  |
| O  | -11.409216 | -1.570667 | -4.015434  |
| H  | -12.008199 | -1.642025 | -3.251716  |
| H  | -5.255811  | -7.207674 | -1.832807  |
| O  | -5.256475  | -7.290015 | -2.810025  |
| H  | -4.756451  | -8.100241 | -2.993549  |
| H  | -12.331137 | -4.401773 | 1.371091   |
| O  | -12.878203 | -5.090157 | 1.788888   |
| H  | -13.327873 | -4.652425 | 2.527599   |

2N1O1S<sub>M109c</sub>

|   |           |           |            |
|---|-----------|-----------|------------|
| C | 0.000000  | 0.000000  | 0.000000   |
| O | 0.000000  | 0.000000  | 1.234500   |
| N | 1.100800  | 0.000000  | -0.799600  |
| C | 2.495400  | 0.301500  | -0.362200  |
| H | 0.936000  | 0.247700  | -1.776600  |
| C | 3.138000  | -0.752400 | 0.598800   |
| O | 3.875700  | -0.329800 | 1.519700   |
| N | 2.930100  | -2.041700 | 0.282300   |
| C | 3.667300  | -2.981000 | 1.135700   |
| C | 3.814900  | -4.331100 | 0.435500   |
| O | 2.862518  | -4.771085 | -0.289786  |
| N | 5.008100  | -4.951400 | 0.623000   |
| H | 5.107800  | -5.915700 | 0.314500   |
| H | 5.715300  | -4.563100 | 1.241300   |
| C | 2.983900  | -3.224800 | 2.517300   |
| C | 2.628000  | 1.761000  | 0.170800   |
| C | 4.030100  | 2.370300  | -0.087400  |
| C | -1.353900 | -0.158400 | -0.764100  |
| N | -1.444100 | 0.890600  | -1.824600  |
| C | -2.116800 | 1.102200  | -3.001700  |
| O | -2.238500 | 2.261000  | -3.418500  |
| H | -1.158800 | 1.808300  | -1.467900  |
| C | -1.493700 | -1.635600 | -1.226400  |
| C | -1.290000 | -2.655600 | -0.131100  |
| C | -2.041600 | -3.045700 | 0.948700   |
| N | -1.366800 | -4.107200 | 1.513500   |
| C | -0.240400 | -4.325900 | 0.794200   |
| N | -0.164600 | -3.462600 | -0.214200  |
| H | -1.645900 | -4.608700 | 2.349300   |
| C | -2.737600 | -0.001000 | -3.895400  |
| N | -1.722000 | -1.025000 | -4.244100  |
| C | -1.937900 | -2.141000 | -4.951100  |
| O | -3.064300 | -2.473800 | -5.392300  |
| C | -0.738700 | -3.116200 | -5.127200  |
| N | -1.099600 | -3.984200 | -6.270500  |
| C | -0.823300 | -5.304900 | -6.341500  |
| O | -0.119400 | -5.933700 | -5.543400  |
| H | -1.768900 | -3.585400 | -6.926600  |
| H | -0.764100 | -0.702700 | -4.096800  |
| C | -1.473900 | -6.030100 | -7.542500  |
| N | -0.392600 | -6.592800 | -8.369000  |
| C | -0.377200 | -6.545900 | -9.723700  |
| O | -1.240800 | -5.958300 | -10.401600 |
| H | 0.331500  | -7.109500 | -7.879200  |

|    |           |            |            |
|----|-----------|------------|------------|
| C  | 0.858500  | -7.217800  | -10.360800 |
| N  | 0.478600  | -7.835200  | -11.630600 |
| C  | -0.233100 | -8.992200  | -11.670500 |
| O  | -0.410900 | -9.695300  | -10.671200 |
| H  | 0.609600  | -7.263500  | -12.461500 |
| C  | -4.090200 | -0.512400  | -3.301600  |
| C  | -5.260500 | -0.291700  | -4.301300  |
| C  | -6.556300 | -1.049400  | -3.885700  |
| C  | -6.878300 | -2.219400  | -4.831200  |
| N  | -5.757100 | -3.226200  | -4.832800  |
| H  | -5.645500 | -3.618200  | -3.891900  |
| H  | -5.951800 | -4.038100  | -5.470300  |
| H  | -4.839700 | -2.820100  | -5.129100  |
| C  | -2.411100 | -7.147400  | -6.976900  |
| C  | -3.298500 | -7.706300  | -8.071100  |
| O  | -4.273000 | -7.056400  | -8.524900  |
| N  | -2.944300 | -8.909100  | -8.540800  |
| H  | -2.096800 | -9.372100  | -8.217300  |
| H  | -3.444200 | -9.355700  | -9.308200  |
| C  | -0.801100 | -9.342600  | -13.073500 |
| N  | -1.605300 | -10.568400 | -12.983300 |
| C  | -2.707500 | -10.773100 | -12.233100 |
| O  | -3.341300 | -9.863700  | -11.650900 |
| C  | -3.157600 | -12.205600 | -12.148300 |
| H  | -1.177100 | -11.391600 | -13.394300 |
| C  | 0.680500  | -2.493000  | -5.327900  |
| C  | 1.832900  | -3.268900  | -4.625600  |
| H  | -2.944500 | -2.617200  | 1.383700   |
| Cu | 1.594268  | -2.837809  | -1.037376  |
| C  | 2.013200  | -6.176500  | -10.582600 |
| O  | 1.767000  | -5.400200  | -11.768700 |
| H  | 1.057200  | -4.771100  | -11.555000 |
| C  | 3.359400  | -6.888100  | -10.745200 |
| H  | 0.498200  | -5.096500  | 0.988000   |
| C  | -1.481300 | -8.053000  | -13.696800 |
| C  | -2.882100 | -8.138500  | -14.389700 |
| C  | -3.682100 | -6.830500  | -14.123100 |
| C  | -4.630600 | -6.851500  | -12.904600 |
| N  | -3.923100 | -7.154200  | -11.598300 |
| H  | -3.114700 | -6.537800  | -11.411100 |
| H  | -3.622700 | -8.160000  | -11.591900 |
| H  | -4.561200 | -7.031700  | -10.792900 |
| S  | 2.393161  | -2.442904  | -3.157711  |
| H  | -4.239300 | -12.257800 | -12.363600 |
| H  | -2.622900 | -12.900000 | -12.821600 |
| H  | 1.958300  | -3.598600  | 2.350800   |

|   |           |            |            |
|---|-----------|------------|------------|
| H | 3.354300  | -7.582200  | -11.602300 |
| H | 4.151200  | -6.132600  | -10.915200 |
| H | 2.955300  | -2.266600  | 3.063700   |
| H | 3.602400  | -7.455500  | -9.823600  |
| H | -1.515000 | -7.291500  | -12.898600 |
| H | 4.131400  | 3.324700   | 0.471300   |
| H | 2.445600  | 1.767900   | 1.263800   |
| H | -3.084800 | -6.683700  | -6.225500  |
| H | -7.799800 | -2.748600  | -4.519700  |
| H | -3.020100 | -12.556300 | -11.106600 |
| H | -3.449100 | -9.027600  | -14.064600 |
| H | 1.579700  | -4.331700  | -4.453100  |
| H | -5.418000 | -7.619100  | -13.014000 |
| H | 0.888800  | -2.471000  | -6.417100  |
| H | -5.122800 | -5.863600  | -12.801500 |
| H | -2.725500 | -8.242500  | -15.483400 |
| H | -4.340500 | -6.593500  | -14.987500 |
| H | -1.789700 | -7.915900  | -6.465900  |
| H | -7.010000 | -1.863100  | -5.870100  |
| H | 3.562100  | -3.957500  | 3.121100   |
| H | -5.467300 | 0.796400   | -4.365400  |
| H | 2.737900  | -3.235100  | -5.270500  |
| H | -0.741000 | -1.881100  | -2.002100  |
| H | -7.439300 | -0.376200  | -3.915000  |
| C | 4.120061  | -3.042004  | -3.099511  |
| H | 4.096661  | -4.147304  | -3.100811  |
| H | 4.663661  | -2.635104  | -3.972511  |
| H | 4.543161  | -2.690304  | -2.142811  |
| H | 0.067900  | -9.601600  | -13.719200 |
| H | -0.784300 | -7.655800  | -14.462600 |
| H | 1.223200  | -8.022400  | -9.688800  |
| H | 4.831900  | 1.678400   | 0.223900   |
| H | -4.925800 | -0.593500  | -5.316000  |
| H | 0.726900  | -1.431700  | -5.007500  |
| H | -2.987000 | -5.968600  | -14.031100 |
| H | 1.868400  | 2.403700   | -0.322400  |
| H | -6.484800 | -1.424900  | -2.841800  |
| H | -2.989000 | 0.582100   | -4.810800  |
| H | -2.045100 | -5.332000  | -8.184200  |
| S | 4.228800  | 2.762500   | -1.870100  |
| C | 5.819700  | 3.631500   | -1.895700  |
| H | 6.039900  | 3.889600   | -2.947000  |
| H | 5.763200  | 4.552000   | -1.288900  |
| H | 6.615900  | 2.973000   | -1.506500  |
| H | -4.014500 | -1.576300  | -2.997400  |
| H | -2.142300 | 0.063800   | -0.013800  |

|   |           |           |           |
|---|-----------|-----------|-----------|
| H | 2.073300  | -5.521200 | -9.684700 |
| H | 3.091000  | 0.221100  | -1.291300 |
| H | -0.745800 | -3.753100 | -4.214000 |
| H | -4.315400 | 0.039300  | -2.362400 |
| H | -2.503600 | -1.802200 | -1.636300 |
| H | 4.680300  | -2.569100 | 1.351100  |
| O | 1.112500  | 0.766300  | -4.192800 |
| H | 2.043900  | 0.516600  | -4.087500 |
| H | 1.067700  | 1.701600  | -3.890200 |
| H | -5.467300 | -6.028200 | -7.237700 |
| O | -6.090500 | -5.639600 | -6.582900 |
| H | -6.912900 | -6.136300 | -6.700500 |
| H | 1.850400  | 3.687300  | -2.643700 |
| O | 0.953200  | 3.376700  | -2.877000 |
| H | 0.476000  | 4.145800  | -3.223700 |
| H | -3.204300 | 0.509200  | 3.176100  |
| O | -2.952800 | -0.025200 | 2.408200  |
| H | -1.981600 | 0.057500  | 2.347700  |
| O | 0.411800  | -6.393800 | -2.110600 |
| H | 1.371800  | -6.393800 | -2.110600 |
| H | 0.091300  | -5.488900 | -2.110600 |
| O | -3.923000 | -3.559400 | -1.046400 |
| H | -2.963000 | -3.559400 | -1.046400 |
| H | -4.243500 | -2.654500 | -1.046400 |

### 3N1S<sub>M112a</sub>

|   |           |           |           |
|---|-----------|-----------|-----------|
| C | 0.000000  | 0.000000  | 0.000000  |
| O | 0.000000  | 0.000000  | 1.239800  |
| N | 1.128900  | 0.000000  | -0.741800 |
| H | 2.023800  | -0.106100 | -0.269600 |
| H | 1.082600  | -0.240700 | -1.729400 |
| C | -1.316200 | 0.001000  | -0.804800 |
| N | -2.031400 | -1.247400 | -0.532900 |
| C | -1.666000 | -2.423400 | -1.127000 |
| O | -0.806200 | -2.491300 | -2.013900 |
| H | -2.735200 | -1.258300 | 0.202200  |
| C | -2.360200 | -3.670600 | -0.551500 |
| N | -2.846200 | -4.519200 | -1.648600 |
| C | -4.127600 | -4.875300 | -1.914200 |
| O | -4.358500 | -5.634800 | -2.878000 |
| H | -2.164800 | -4.900200 | -2.301600 |
| C | -1.337600 | -4.440800 | 0.330500  |
| C | -5.326000 | -4.353900 | -1.072600 |
| N | -5.437000 | -4.767900 | 0.323400  |
| C | -5.371500 | -6.022500 | 0.729300  |

|   |           |           |           |
|---|-----------|-----------|-----------|
| O | -4.911700 | -7.056900 | 0.108300  |
| C | -1.197000 | -3.728000 | 1.706200  |
| C | -5.984200 | -6.282300 | 2.130500  |
| N | -5.792900 | -5.103800 | 2.993000  |
| C | -5.911600 | -5.111700 | 4.308100  |
| O | -5.637700 | -4.087400 | 5.026500  |
| C | -2.185300 | 1.226800  | -0.452700 |
| H | -2.383800 | 1.262600  | 0.634600  |
| H | -3.217200 | -3.401200 | 0.094800  |
| H | -3.128700 | 1.172100  | -1.029300 |
| H | -1.648100 | 2.148000  | -0.750500 |
| H | -1.088300 | -2.629300 | 1.607000  |
| H | -6.185800 | -4.784700 | -1.630000 |
| H | -1.680000 | -5.489900 | 0.464900  |
| H | -1.089900 | 0.026400  | -1.892100 |
| H | -0.310100 | -4.095800 | 2.272700  |
| C | -6.383800 | -6.347800 | 5.128600  |
| N | -5.348900 | -6.505900 | 6.165500  |
| C | -4.802300 | -7.649100 | 6.625200  |
| O | -5.121000 | -8.801000 | 6.302400  |
| H | -5.033500 | -5.612800 | 6.537000  |
| C | -3.649300 | -7.339600 | 7.623200  |
| N | -4.246800 | -7.057200 | 8.945100  |
| C | -3.934700 | -5.966300 | 9.682700  |
| O | -3.124400 | -5.100600 | 9.310300  |
| H | -4.866800 | -7.757400 | 9.338200  |
| C | -4.726900 | -5.834200 | 10.997600 |
| N | -3.919600 | -5.085600 | 11.963100 |
| C | -2.863100 | -5.674400 | 12.581700 |
| O | -2.699900 | -6.899000 | 12.600200 |
| H | -4.012200 | -4.072900 | 11.911700 |
| H | -3.166000 | -6.394400 | 7.305300  |
| C | -1.871800 | -4.687400 | 13.264800 |
| N | -0.730800 | -5.451700 | 13.789700 |
| C | 0.121700  | -6.223500 | 13.076900 |
| O | 0.229100  | -6.191900 | 11.834600 |
| H | -0.748100 | -5.610700 | 14.791400 |
| C | 0.985400  | -7.138400 | 13.908200 |
| H | 2.027900  | -7.069300 | 13.552400 |
| H | 0.960100  | -6.936300 | 14.995000 |
| H | 0.647300  | -8.178700 | 13.738200 |
| C | -7.760400 | -6.032200 | 5.786900  |
| C | -8.408300 | -7.318500 | 6.381700  |
| H | -7.670900 | -7.917000 | 6.949900  |
| H | -7.623000 | -5.259800 | 6.568600  |
| H | -6.430200 | -7.293500 | 4.551200  |

|   |            |           |           |
|---|------------|-----------|-----------|
| H | -4.905500  | -6.846300 | 11.415600 |
| H | -8.451100  | -5.612800 | 5.022500  |
| C | -2.598500  | -8.479600 | 7.690600  |
| C | -1.325300  | -7.945100 | 8.323300  |
| O | -0.620400  | -7.082000 | 7.761400  |
| N | -1.038600  | -8.442900 | 9.543500  |
| H | -0.276400  | -8.057000 | 10.098200 |
| H | -1.701500  | -9.047300 | 10.023300 |
| H | -2.367900  | -8.803000 | 6.654000  |
| H | -3.026900  | -9.359200 | 8.226800  |
| H | -2.387300  | -4.265300 | 14.156200 |
| H | -8.816300  | -7.958400 | 5.564600  |
| H | -5.476400  | -7.183200 | 2.541400  |
| H | -0.342500  | -4.476200 | -0.168900 |
| C | -6.115100  | -5.129400 | 10.755900 |
| O | -5.938700  | -3.713400 | 10.651300 |
| H | -5.850200  | -3.501400 | 9.698200  |
| C | -7.066800  | -5.416800 | 11.919300 |
| H | -6.686800  | -4.979700 | 12.859900 |
| H | -8.053900  | -4.965300 | 11.702800 |
| H | -7.197900  | -6.509400 | 12.060600 |
| H | -6.546900  | -5.546100 | 9.814700  |
| S | -9.785200  | -6.836400 | 7.478300  |
| C | -10.454000 | -8.451600 | 7.961000  |
| H | -10.771800 | -9.015400 | 7.066400  |
| H | -9.705600  | -9.037000 | 8.525800  |
| H | -11.334000 | -8.260800 | 8.602700  |
| C | -7.509200  | -6.606100 | 1.892100  |
| H | -7.951900  | -6.894600 | 2.864300  |
| H | -8.011800  | -5.675100 | 1.563000  |
| C | -7.776700  | -7.770700 | 0.882900  |
| C | -8.081700  | -7.252500 | -0.554000 |
| C | -7.573900  | -8.170300 | -1.693600 |
| N | -6.117200  | -7.913900 | -1.989100 |
| H | -5.660700  | -8.751900 | -2.374900 |
| H | -5.954800  | -7.140000 | -2.654300 |
| H | -8.163400  | -8.005600 | -2.611700 |
| H | -7.664400  | -6.240300 | -0.693000 |
| H | -7.684200  | -9.228700 | -1.386300 |
| H | -8.661900  | -8.347200 | 1.224000  |
| H | -6.915700  | -8.472200 | 0.890700  |
| H | -9.182100  | -7.144000 | -0.671200 |
| C | -1.559200  | -3.486300 | 12.284000 |
| H | -1.973100  | -3.761600 | 11.299700 |
| H | -2.153200  | -2.619300 | 12.637600 |
| C | -0.094000  | -2.964900 | 12.111500 |

|    |            |           |           |
|----|------------|-----------|-----------|
| H  | 0.646100   | -3.742200 | 12.367400 |
| C  | 0.106200   | -2.447700 | 10.656300 |
| C  | 0.677100   | -3.461000 | 9.638000  |
| N  | -0.193500  | -4.686400 | 9.473300  |
| H  | -1.183600  | -4.460800 | 9.274200  |
| H  | 0.116900   | -5.284700 | 8.686100  |
| H  | -0.127800  | -5.277000 | 10.330400 |
| H  | 1.679600   | -3.823000 | 9.932300  |
| H  | 0.750200   | -2.972800 | 8.647900  |
| H  | 0.062900   | -2.121500 | 12.817100 |
| H  | -0.853100  | -2.056800 | 10.257200 |
| H  | 0.823200   | -1.597400 | 10.642300 |
| C  | -5.530500  | -2.787000 | -1.230400 |
| C  | -6.192100  | -2.062100 | -0.077200 |
| C  | -7.343900  | -1.315900 | -0.137500 |
| N  | -7.576400  | -0.852500 | 1.143300  |
| C  | -6.573200  | -1.305000 | 1.936200  |
| N  | -5.724900  | -2.049500 | 1.236200  |
| H  | -8.320400  | -0.213200 | 1.412000  |
| H  | -6.499000  | -1.096000 | 2.998200  |
| H  | -7.992700  | -1.076100 | -0.979300 |
| H  | -4.586200  | -2.253000 | -1.452500 |
| H  | -6.172900  | -2.643200 | -2.132800 |
| S  | -2.673800  | -4.071800 | 2.735600  |
| C  | -2.397100  | -2.975000 | 4.156300  |
| H  | -3.279000  | -3.136000 | 4.803300  |
| H  | -2.307700  | -1.911300 | 3.851600  |
| H  | -1.459000  | -3.295400 | 4.656800  |
| H  | -5.586400  | -7.604800 | -1.068800 |
| Cu | -4.781225  | -3.707855 | 1.929191  |
| H  | 0.515800   | -0.787300 | 3.252200  |
| O  | 0.697100   | -1.144300 | 4.144800  |
| H  | 1.469100   | -0.637900 | 4.441200  |
| H  | -1.405400  | -6.465600 | 3.809900  |
| O  | -1.068300  | -7.322100 | 4.130800  |
| H  | -1.005600  | -7.213800 | 5.095500  |
| H  | -3.017600  | -7.895100 | 0.652000  |
| O  | -2.070200  | -8.129900 | 0.680400  |
| H  | -1.893500  | -8.334400 | 1.614000  |
| O  | -5.446200  | -2.856100 | 7.756500  |
| H  | -5.636400  | -3.202700 | 6.855300  |
| H  | -4.505500  | -2.613700 | 7.728900  |
| O  | -9.833100  | -4.103500 | -0.337900 |
| H  | -10.601700 | -3.524900 | -0.218000 |
| H  | -9.064300  | -3.519400 | -0.210600 |
| O  | -1.679200  | -1.899000 | 7.517900  |



|   |           |           |          |
|---|-----------|-----------|----------|
| H | -1.800200 | -2.118900 | 6.576900 |
| H | -1.509100 | -0.943500 | 7.510600 |

3N1S<sub>M112c</sub>

|   |           |           |           |
|---|-----------|-----------|-----------|
| C | 0.000000  | 0.000000  | 0.000000  |
| O | 0.000000  | 0.000000  | 1.238400  |
| N | 1.144800  | 0.000000  | -0.720400 |
| H | 1.155900  | -0.018300 | -1.736900 |
| H | 2.031300  | 0.027000  | -0.224000 |
| C | -1.299500 | 0.057300  | -0.815900 |
| N | -2.274700 | -0.856300 | -0.217900 |
| C | -3.154400 | -1.567100 | -0.967000 |
| O | -3.185000 | -1.536100 | -2.204200 |
| H | -2.342800 | -0.867400 | 0.796100  |
| C | -1.837400 | 1.514200  | -0.864200 |
| H | -2.193300 | 1.829600  | 0.131700  |
| H | -2.668500 | 1.562600  | -1.593200 |
| C | -4.106300 | -2.499300 | -0.165900 |
| N | -5.451000 | -2.292100 | -0.736700 |
| C | -6.718800 | -2.171000 | -0.280200 |
| O | -7.620900 | -2.214300 | -1.152300 |
| H | -5.458100 | -2.336100 | -1.755600 |
| C | -3.680400 | -3.988200 | -0.405100 |
| C | -2.828900 | -4.629700 | 0.733300  |
| H | -2.361100 | -3.884800 | 1.404000  |
| H | -4.601900 | -4.599000 | -0.509900 |
| H | -1.041400 | 2.206400  | -1.204500 |
| H | -4.066100 | -2.264700 | 0.914000  |
| H | -2.024300 | -5.272600 | 0.315700  |
| H | -1.132200 | -0.279300 | -1.860800 |
| H | -3.147000 | -4.077200 | -1.372800 |
| C | -7.245700 | -1.865600 | 1.165400  |
| N | -8.507900 | -2.633800 | 1.311300  |
| C | -8.728600 | -3.966700 | 1.516400  |
| O | -9.926200 | -4.343500 | 1.592900  |
| H | -9.339500 | -2.063500 | 1.376800  |
| C | -7.515700 | -4.903000 | 1.553800  |
| N | -7.036029 | -4.984086 | 2.969532  |
| C | -7.506200 | -5.929800 | 3.820000  |
| O | -8.276800 | -6.902400 | 3.626900  |
| C | -6.912300 | -5.730300 | 5.242500  |
| N | -5.446314 | -5.582674 | 5.134673  |
| C | -4.747314 | -6.017674 | 6.165173  |
| O | -5.189514 | -6.461774 | 7.284673  |
| C | -3.215014 | -5.943274 | 5.945973  |

|   |           |            |           |
|---|-----------|------------|-----------|
| N | -2.638914 | -4.991074  | 6.917173  |
| C | -1.631714 | -4.152474  | 6.636073  |
| O | -1.007914 | -4.147474  | 5.544973  |
| H | -3.065114 | -4.956374  | 7.843873  |
| H | -3.076914 | -5.502374  | 4.949773  |
| C | -7.738600 | -6.222500  | 0.772300  |
| C | -1.232814 | -3.210174  | 7.800273  |
| N | -0.223214 | -3.924774  | 8.611373  |
| C | -0.596314 | -4.676074  | 9.680873  |
| O | -1.760714 | -4.756574  | 10.087373 |
| H | 0.752486  | -3.861674  | 8.321073  |
| C | -0.726914 | -1.843574  | 7.261473  |
| O | 0.454386  | -2.018474  | 6.438573  |
| H | 0.184686  | -2.744874  | 5.825873  |
| C | -0.404514 | -0.855574  | 8.386773  |
| C | 0.574086  | -5.447174  | 10.352373 |
| N | 0.201686  | -5.790674  | 11.740473 |
| C | -0.640614 | -6.770874  | 12.165573 |
| O | -0.981814 | -7.769974  | 11.504673 |
| H | 0.301686  | -5.013374  | 12.391673 |
| C | -1.134614 | -6.568574  | 13.578273 |
| H | -1.127214 | -7.538574  | 14.103973 |
| H | 0.426186  | -1.225174  | 9.020573  |
| H | -8.552400 | -6.810600  | 1.236000  |
| H | -0.557214 | -5.829874  | 14.165973 |
| H | -2.186514 | -6.231574  | 13.514673 |
| H | -0.095414 | 0.117026   | 7.953273  |
| H | -1.303714 | -0.697374  | 9.017973  |
| H | -6.790300 | -6.785800  | 0.886500  |
| H | -2.095914 | -3.026874  | 8.467773  |
| H | -7.589800 | -0.817800  | 1.024100  |
| H | -6.672200 | -4.382900  | 1.051500  |
| C | 0.950686  | -6.636574  | 9.421173  |
| H | 0.021186  | -7.145974  | 9.109773  |
| C | 2.009786  | -7.611774  | 10.006073 |
| H | 1.768386  | -7.882474  | 11.054673 |
| C | 2.146086  | -8.876874  | 9.109873  |
| C | 1.307886  | -10.091474 | 9.560273  |
| N | -0.170814 | -9.806074  | 9.645473  |
| H | -0.666714 | -10.684074 | 9.841173  |
| H | -0.395614 | -9.146974  | 10.423273 |
| H | 1.437986  | -10.913574 | 8.830973  |
| H | 1.637386  | -10.453574 | 10.552873 |
| H | 1.892786  | -8.631474  | 8.057973  |
| H | 1.396486  | -6.201174  | 8.507673  |
| H | 3.197486  | -9.238974  | 9.108773  |

|   |            |           |           |
|---|------------|-----------|-----------|
| H | -7.175400  | -6.625500 | 5.855200  |
| H | 2.993386   | -7.095074 | 10.031073 |
| H | -1.557914  | -1.424374 | 6.655873  |
| H | 1.455886   | -4.770774 | 10.431673 |
| C | -7.509700  | -4.474500 | 5.953600  |
| C | -9.058200  | -4.529200 | 5.958900  |
| H | -9.471300  | -4.653400 | 4.940800  |
| H | -7.149200  | -4.497700 | 7.003800  |
| H | -7.155600  | -3.563200 | 5.436400  |
| H | -9.385100  | -5.378100 | 6.603100  |
| C | -7.999400  | -5.975500 | -0.754700 |
| C | -9.496600  | -6.190400 | -1.142100 |
| C | -10.157100 | -5.049500 | -1.932200 |
| N | -10.178400 | -3.770500 | -1.126900 |
| H | -10.882900 | -3.124600 | -1.506600 |
| H | -9.256500  | -3.271000 | -1.137600 |
| H | -10.403700 | -3.969800 | -0.115300 |
| H | -9.631300  | -4.838300 | -2.882000 |
| H | -11.208500 | -5.322000 | -2.147300 |
| H | -10.097600 | -6.390500 | -0.231900 |
| H | -7.629900  | -4.973000 | -1.062800 |
| H | -9.584200  | -7.095700 | -1.781400 |
| H | -7.387800  | -6.699000 | -1.345900 |
| H | -0.577514  | -9.400374 | 8.722373  |
| C | -6.581700  | -1.949200 | 2.581800  |
| C | -5.146100  | -1.639700 | 2.869900  |
| C | -4.438700  | -0.465200 | 2.925500  |
| N | -3.196000  | -0.792000 | 3.412200  |
| C | -3.192100  | -2.120800 | 3.699000  |
| N | -4.354200  | -2.671100 | 3.361000  |
| H | -2.440500  | -0.145900 | 3.664100  |
| H | -2.343700  | -2.643400 | 4.146000  |
| H | -4.762700  | 0.556000  | 2.720900  |
| H | -6.763400  | -2.957800 | 3.012500  |
| H | -7.178800  | -1.237700 | 3.186300  |
| C | -2.498814  | -7.345274 | 5.943573  |
| C | -2.226814  | -8.033474 | 7.270773  |
| O | -1.147914  | -8.684974 | 7.410973  |
| N | -3.156314  | -7.892474 | 8.206773  |
| H | -3.003314  | -8.277774 | 9.139273  |
| H | -4.052514  | -7.351974 | 7.993873  |
| H | -3.145714  | -8.026774 | 5.349073  |
| H | -1.520814  | -7.253474 | 5.421573  |
| S | -9.726900  | -2.982700 | 6.671500  |
| C | -11.503200 | -3.185300 | 6.372000  |
| H | -11.872400 | -4.076100 | 6.910700  |

|    |            |           |          |
|----|------------|-----------|----------|
| H  | -12.019800 | -2.288200 | 6.762100 |
| H  | -11.703500 | -3.293600 | 5.289900 |
| S  | -3.932312  | -5.715659 | 1.754376 |
| C  | -2.736212  | -7.005759 | 2.228576 |
| H  | -3.304612  | -7.727559 | 2.836976 |
| H  | -2.362512  | -7.495859 | 1.306976 |
| H  | -1.908112  | -6.559359 | 2.808776 |
| Cu | -5.072381  | -4.580147 | 3.397805 |
| O  | 3.150000   | -4.403200 | 7.932300 |
| H  | 2.973600   | -4.477000 | 6.978900 |
| H  | 3.622800   | -3.556700 | 8.000200 |
| O  | -0.500300  | 0.432000  | 4.282600 |
| H  | -0.082800  | 0.291300  | 3.413300 |
| H  | -0.046300  | -0.178300 | 4.890300 |
| O  | -5.683500  | -9.029000 | 3.399000 |
| H  | -6.102900  | -9.778900 | 2.952200 |
| H  | -6.426400  | -8.415400 | 3.569200 |
| O  | -7.826700  | 1.371100  | 2.644400 |
| H  | -8.265500  | 2.233000  | 2.585500 |
| H  | -7.998400  | 1.063600  | 3.557900 |
| H  | -8.416400  | 0.650100  | 6.234400 |
| O  | -8.095700  | 0.108400  | 5.497400 |
| H  | -8.541800  | -0.755200 | 5.632500 |
| H  | -4.697700  | -0.811100 | 7.434000 |
| O  | -4.201000  | -1.446900 | 7.977300 |
| H  | -4.889500  | -2.059600 | 8.284800 |

#### 2N1O1S<sub>M112a</sub>

|   |           |           |           |
|---|-----------|-----------|-----------|
| C | 0.000000  | 0.000000  | 0.000000  |
| O | 0.000000  | 0.000000  | 1.236700  |
| N | 1.136000  | 0.000000  | -0.733100 |
| H | 2.026300  | 0.035500  | -0.243800 |
| H | 1.143300  | -0.022200 | -1.749400 |
| C | -1.320700 | 0.035000  | -0.786400 |
| N | -2.301400 | -0.692300 | 0.025800  |
| C | -3.425900 | -1.237700 | -0.472700 |
| O | -3.723400 | -1.220100 | -1.679000 |
| H | -2.090200 | -0.701600 | 1.022700  |
| C | -1.768500 | 1.505900  | -1.012700 |
| H | -1.985900 | 1.983800  | -0.041900 |
| H | -2.665900 | 1.512500  | -1.658800 |
| H | -0.969200 | 2.075800  | -1.527000 |
| H | -1.229900 | -0.467400 | -1.771800 |
| C | -4.412000 | -1.866800 | 0.560000  |
| N | -5.241600 | -2.781200 | -0.247500 |

|   |            |           |           |
|---|------------|-----------|-----------|
| C | -6.140100  | -3.678900 | 0.197100  |
| O | -6.202080  | -4.152258 | 1.366156  |
| H | -5.278500  | -2.468200 | -1.220400 |
| C | -7.243200  | -3.985500 | -0.825300 |
| N | -8.032800  | -5.182900 | -0.503300 |
| C | -9.013900  | -5.561400 | 0.366300  |
| O | -9.509200  | -6.690900 | 0.134600  |
| H | -7.843000  | -5.953200 | -1.138400 |
| C | -9.676900  | -4.790500 | 1.531500  |
| N | -8.921492  | -4.354616 | 2.675647  |
| C | -9.193292  | -4.986216 | 3.823747  |
| O | -10.072392 | -5.896516 | 4.037047  |
| H | -10.222300 | -5.619000 | 2.008300  |
| C | -8.303492  | -4.592116 | 5.022247  |
| N | -9.127892  | -4.476916 | 6.253147  |
| C | -9.206492  | -3.353216 | 6.991347  |
| O | -8.672892  | -2.263116 | 6.724747  |
| H | -9.603092  | -5.320716 | 6.582747  |
| H | -7.837792  | -3.609116 | 4.863047  |
| C | -10.076492 | -3.477116 | 8.267247  |
| N | -9.307892  | -2.853916 | 9.358947  |
| C | -9.156292  | -3.373616 | 10.596547 |
| O | -9.645992  | -4.458716 | 10.963547 |
| H | -8.848192  | -1.977616 | 9.122747  |
| C | -8.236792  | -2.541316 | 11.515347 |
| N | -8.721092  | -2.611216 | 12.893247 |
| C | -9.829292  | -1.929316 | 13.287447 |
| O | -10.334192 | -1.033316 | 12.604747 |
| H | -8.320992  | -3.352016 | 13.465047 |
| C | -10.402992 | -2.379816 | 14.660547 |
| N | -11.636392 | -1.631716 | 14.937347 |
| C | -12.763492 | -1.612916 | 14.192347 |
| O | -13.013792 | -2.421616 | 13.273447 |
| H | -11.546492 | -0.904316 | 15.639147 |
| C | -13.745892 | -0.534116 | 14.563247 |
| H | -14.751292 | -0.980216 | 14.655447 |
| H | -13.506192 | 0.010784  | 15.494747 |
| H | -10.280792 | -4.526116 | 8.556247  |
| H | -13.789092 | 0.197084  | 13.732847 |
| C | -3.786200  | -2.479300 | 1.846200  |
| C | -4.172800  | -1.695600 | 3.115800  |
| H | -4.097600  | -3.530700 | 1.952500  |
| H | -8.267692  | -1.478616 | 11.197647 |
| C | -11.425492 | -2.726716 | 8.031847  |
| C | -12.371492 | -2.955116 | 9.200647  |
| O | -12.862492 | -4.074016 | 9.439447  |

|   |            |           |           |
|---|------------|-----------|-----------|
| N | -12.629592 | -1.857016 | 9.936847  |
| H | -12.086292 | -1.007116 | 9.800947  |
| H | -13.153392 | -1.924716 | 10.808247 |
| H | -11.921792 | -3.157416 | 7.138247  |
| H | -2.676300  | -2.528700 | 1.798800  |
| H | -3.442600  | -1.902600 | 3.927000  |
| C | -7.190292  | -5.669916 | 5.206247  |
| H | -6.550992  | -5.674516 | 4.306947  |
| C | -6.326092  | -5.369416 | 6.468947  |
| H | -7.659592  | -6.672416 | 5.302847  |
| H | -6.044592  | -4.296116 | 6.500047  |
| H | -11.212992 | -1.652216 | 7.835447  |
| H | -9.675192  | -2.058916 | 15.439047 |
| C | -10.747000 | -3.768600 | 1.018900  |
| H | -10.467400 | -2.753500 | 1.368800  |
| C | -12.175600 | -4.152600 | 1.520300  |
| H | -12.113800 | -4.459900 | 2.583700  |
| H | -12.824800 | -3.252100 | 1.499300  |
| H | -10.790600 | -3.734900 | -0.091600 |
| H | -4.189700  | -0.592100 | 2.964400  |
| H | -6.910292  | -5.618616 | 7.384647  |
| H | -5.097700  | -1.041900 | 0.861500  |
| H | -6.741000  | -4.256600 | -1.784100 |
| C | -12.849900 | -5.267000 | 0.650200  |
| C | -13.101900 | -6.619100 | 1.345600  |
| N | -11.850600 | -7.337800 | 1.762600  |
| H | -11.138700 | -7.353100 | 0.999600  |
| H | -12.085900 | -8.327800 | 2.030100  |
| H | -11.377200 | -6.875100 | 2.561600  |
| H | -12.284500 | -5.443300 | -0.285000 |
| H | -13.736500 | -6.496600 | 2.243800  |
| H | -13.632300 | -7.294200 | 0.644800  |
| H | -13.861700 | -4.926500 | 0.336500  |
| C | -6.755492  | -3.059316 | 11.425147 |
| O | -6.564592  | -4.194016 | 12.290547 |
| H | -6.964292  | -4.958716 | 11.842547 |
| C | -5.775192  | -1.964716 | 11.848047 |
| H | -5.962792  | -1.631716 | 12.883047 |
| H | -4.741192  | -2.359716 | 11.792547 |
| H | -5.863492  | -1.095116 | 11.164647 |
| H | -6.541792  | -3.338916 | 10.366947 |
| S | -4.723092  | -6.235416 | 6.550747  |
| C | -5.173292  | -7.983216 | 6.344347  |
| H | -5.554492  | -8.169516 | 5.326147  |
| H | -5.912792  | -8.272416 | 7.115047  |
| H | -4.240092  | -8.559416 | 6.497447  |

|    |            |            |           |
|----|------------|------------|-----------|
| C  | -8.113200  | -2.704600  | -1.135300 |
| C  | -7.963000  | -1.431000  | -0.336200 |
| C  | -7.811800  | -0.169200  | -0.857100 |
| N  | -7.858700  | 0.700100   | 0.204300  |
| C  | -8.039200  | -0.029300  | 1.327500  |
| N  | -8.086600  | -1.330400  | 1.046500  |
| H  | -7.819900  | 1.722800   | 0.169200  |
| H  | -8.135400  | 0.411500   | 2.314900  |
| H  | -7.677400  | 0.166900   | -1.882800 |
| H  | -9.171100  | -2.998400  | -1.024000 |
| H  | -7.999500  | -2.431600  | -2.204700 |
| C  | -10.470192 | -3.962516  | 14.706647 |
| H  | -10.243292 | -4.322416  | 13.688147 |
| H  | -9.629292  | -4.305016  | 15.343547 |
| C  | -11.744992 | -4.694616  | 15.242147 |
| H  | -12.637892 | -4.048416  | 15.191647 |
| C  | -11.963692 | -6.020716  | 14.456647 |
| C  | -12.909992 | -5.940416  | 13.237647 |
| N  | -12.461692 | -4.938116  | 12.198147 |
| H  | -11.485792 | -5.073316  | 11.884747 |
| H  | -13.029292 | -4.990616  | 11.332247 |
| H  | -12.590592 | -3.968516  | 12.571447 |
| H  | -13.932792 | -5.646116  | 13.534347 |
| H  | -12.966492 | -6.933216  | 12.748147 |
| H  | -11.585892 | -4.937516  | 16.313547 |
| H  | -10.986892 | -6.440116  | 14.133247 |
| H  | -12.416892 | -6.792616  | 15.116647 |
| S  | -5.842067  | -2.126291  | 3.826430  |
| C  | -6.155267  | -0.528091  | 4.648230  |
| H  | -7.009967  | -0.663991  | 5.334030  |
| H  | -6.343367  | 0.264309   | 3.901630  |
| H  | -5.252767  | -0.273491  | 5.236430  |
| Cu | -7.569802  | -2.736860  | 2.371185  |
| O  | -12.773200 | -9.955400  | 2.571000  |
| H  | -12.367400 | -10.796100 | 2.310000  |
| H  | -12.779100 | -9.965800  | 3.555700  |
| O  | -12.617000 | -9.644200  | 5.457200  |
| H  | -12.578500 | -10.394400 | 6.069400  |
| H  | -11.945000 | -9.010700  | 5.782500  |
| O  | -7.738900  | 3.597200   | 1.138700  |
| H  | -8.504400  | 4.193600   | 1.117800  |
| H  | -6.976700  | 4.189200   | 1.034200  |
| O  | -10.946000 | -7.209000  | 6.312000  |
| H  | -11.750600 | -6.722800  | 6.559500  |
| H  | -10.629200 | -6.755400  | 5.488200  |
| H  | -3.022800  | -5.064500  | 4.684800  |

|   |           |           |          |
|---|-----------|-----------|----------|
| O | -2.400600 | -4.540000 | 4.142100 |
| H | -1.534500 | -4.939000 | 4.318400 |
| H | -6.358300 | -6.502700 | 1.940600 |
| O | -6.377800 | -7.412900 | 2.293400 |
| H | -5.883400 | -7.933600 | 1.642900 |

2N1O1S<sub>M112d</sub>

|   |           |           |           |
|---|-----------|-----------|-----------|
| C | 0.000000  | 0.000000  | 0.000000  |
| O | 0.000000  | 0.000000  | 1.234800  |
| N | 1.189700  | 0.000000  | -0.669200 |
| C | 1.645100  | 0.213500  | -2.048500 |
| C | -1.395600 | -0.091300 | -0.690500 |
| N | -2.285000 | 0.901100  | -0.061100 |
| C | -1.960431 | 2.177230  | 0.168825  |
| O | -0.733750 | 2.477513  | 0.100302  |
| H | -2.972000 | 0.534300  | 0.588400  |
| C | -3.048400 | 3.199500  | 0.578800  |
| N | -4.425700 | 3.233800  | -0.009800 |
| C | -4.942400 | 4.381100  | -0.594100 |
| O | -6.048400 | 4.796600  | -0.200700 |
| H | -5.125800 | 2.856000  | 0.634700  |
| C | -4.297300 | 5.135000  | -1.770700 |
| N | -2.843500 | 5.016300  | -2.013100 |
| C | -2.113400 | 5.965700  | -1.443700 |
| O | -2.480500 | 6.803300  | -0.534800 |
| C | -0.643200 | 6.116200  | -1.892200 |
| N | -0.495600 | 7.533300  | -2.318200 |
| C | 0.129900  | 7.976600  | -3.429500 |
| O | 0.641900  | 7.241300  | -4.294400 |
| H | -0.880100 | 8.220800  | -1.673100 |
| C | 0.111800  | 9.518900  | -3.583600 |
| N | 1.371800  | 9.958500  | -4.181900 |
| C | 2.522100  | 10.009700 | -3.459900 |
| O | 2.534800  | 9.918000  | -2.228600 |
| H | 1.380600  | 10.038500 | -5.195400 |
| H | -4.579600 | 6.194000  | -1.564000 |
| H | 1.981100  | -0.003000 | -0.023900 |
| C | -1.433200 | -0.068900 | -2.252700 |
| H | -1.077300 | -1.073800 | -2.579100 |
| H | -0.772600 | 0.712100  | -2.649800 |
| C | 3.184300  | -0.022500 | -2.017400 |
| O | 3.843800  | -0.058500 | -0.972300 |
| N | 3.722500  | -0.149500 | -3.253400 |
| C | 5.167200  | -0.214800 | -3.489300 |
| C | 5.652500  | -1.687900 | -3.473600 |



|   |           |           |           |
|---|-----------|-----------|-----------|
| H | 3.163100  | -0.004500 | -4.089300 |
| C | 5.460600  | 0.509900  | -4.815900 |
| O | 4.574900  | 1.057300  | -5.487000 |
| N | 6.755000  | 0.503500  | -5.200700 |
| H | 7.003300  | 0.948200  | -6.077700 |
| H | 7.488500  | 0.031200  | -4.678600 |
| C | 3.805700  | 10.208700 | -4.313100 |
| N | 4.984000  | 10.187400 | -3.436200 |
| C | 5.384200  | 9.186500  | -2.621400 |
| O | 4.927900  | 8.024300  | -2.656400 |
| C | 6.471200  | 9.561300  | -1.649800 |
| H | 5.423300  | 11.090300 | -3.289600 |
| C | -3.109900 | 2.927400  | 2.109300  |
| C | -3.781700 | 4.071300  | 2.919300  |
| C | -2.908600 | 5.353900  | 3.020900  |
| C | -3.689300 | 6.668100  | 2.839500  |
| N | -4.268700 | 6.842100  | 1.454300  |
| H | -4.680900 | 7.783800  | 1.382800  |
| C | 0.313900  | 5.838800  | -0.691100 |
| C | 1.773800  | 5.851400  | -1.131500 |
| O | 2.236000  | 4.986600  | -1.900900 |
| N | 2.519100  | 6.843800  | -0.607600 |
| H | 2.069300  | 7.632800  | -0.146700 |
| H | 3.469700  | 7.001800  | -0.938700 |
| C | -4.997500 | 4.817100  | -3.145200 |
| C | -6.500300 | 4.441500  | -3.105100 |
| C | 1.388900  | 1.675800  | -2.572200 |
| H | 0.679200  | 2.177400  | -1.896300 |
| H | 2.324200  | 2.265500  | -2.489900 |
| C | 0.869800  | 1.750300  | -4.043800 |
| H | -5.024300 | 6.164500  | 1.244600  |
| C | -1.105300 | 9.973600  | -4.463800 |
| O | -0.819400 | 9.788400  | -5.862700 |
| H | -0.852800 | 8.831900  | -6.032700 |
| C | -1.419100 | 11.457100 | -4.237500 |
| H | -3.529100 | 6.768300  | 0.668400  |
| C | 3.783000  | 9.223300  | -5.558300 |
| C | 5.017100  | 8.320400  | -5.897900 |
| C | 4.537400  | 6.934000  | -6.417800 |
| C | 4.431300  | 5.814000  | -5.358200 |
| N | 3.514200  | 6.172500  | -4.212300 |
| H | 2.571300  | 6.472000  | -4.511500 |
| H | 3.959700  | 6.911900  | -3.622000 |
| H | 3.345700  | 5.365400  | -3.581000 |
| H | 6.916300  | 10.559700 | -1.813100 |
| H | 7.269000  | 8.799800  | -1.694400 |

|    |           |           |           |
|----|-----------|-----------|-----------|
| H  | 5.144100  | -2.276600 | -4.258600 |
| H  | -2.283800 | 11.747900 | -4.865300 |
| H  | -0.561500 | 12.094600 | -4.511800 |
| H  | 5.403200  | -2.129200 | -2.490300 |
| H  | -7.107400 | 5.309500  | -2.761500 |
| H  | -1.673300 | 11.633800 | -3.172600 |
| H  | -4.895200 | 5.746300  | -3.738700 |
| H  | 6.749200  | -1.777900 | -3.602000 |
| H  | 2.894500  | 8.579000  | -5.444500 |
| H  | -3.011500 | 7.525700  | 3.011200  |
| H  | 0.124000  | 4.821500  | -0.300000 |
| H  | 6.050800  | 9.529000  | -0.625900 |
| H  | 5.690900  | 8.210000  | -5.031200 |
| H  | -4.524000 | 6.721400  | 3.565400  |
| H  | 5.414400  | 5.582300  | -4.910700 |
| H  | 4.034900  | 4.890500  | -5.826700 |
| H  | -2.487900 | 5.412200  | 4.048900  |
| H  | 5.605300  | 8.819900  | -6.695300 |
| H  | -2.560300 | 4.172100  | 0.400300  |
| H  | 0.100500  | 6.584200  | 0.114000  |
| H  | 5.243300  | 6.540200  | -7.182700 |
| H  | -3.656200 | 1.986100  | 2.336800  |
| H  | -3.967200 | 3.683800  | 3.942900  |
| H  | -2.026400 | 5.321000  | 2.346300  |
| H  | 3.592200  | 9.842400  | -6.457800 |
| H  | -2.070600 | 2.784200  | 2.479700  |
| H  | 1.703200  | 1.899300  | -4.761700 |
| H  | 3.758700  | 11.243400 | -4.720900 |
| H  | 0.029100  | 9.996200  | -2.585500 |
| H  | 0.285700  | 0.864100  | -4.376000 |
| H  | -1.781000 | -1.079300 | -0.361200 |
| H  | -4.429400 | 4.018200  | -3.653700 |
| H  | -6.693100 | 3.589900  | -2.426600 |
| H  | -0.429700 | 5.461200  | -2.752400 |
| H  | 3.559700  | 7.034400  | -6.936100 |
| H  | -4.795000 | 4.278800  | 2.513200  |
| H  | -1.996200 | 9.379300  | -4.163300 |
| H  | 5.673100  | 0.331000  | -2.664900 |
| S  | -6.979000 | 3.986200  | -4.810800 |
| C  | -8.722800 | 3.546500  | -4.596700 |
| H  | -9.279300 | 4.409300  | -4.191100 |
| H  | -8.834800 | 2.674200  | -3.929600 |
| H  | -9.125600 | 3.307300  | -5.598600 |
| H  | 1.203400  | -0.519400 | -2.754500 |
| S  | -0.386402 | 3.226798  | -4.146322 |
| Cu | -2.315325 | 3.222879  | -2.804031 |

|   |           |           |           |
|---|-----------|-----------|-----------|
| N | -3.228500 | 1.460200  | -3.194400 |
| C | -4.431800 | 1.293000  | -3.741000 |
| N | -4.764200 | -0.016600 | -3.769400 |
| C | -3.742300 | -0.734300 | -3.197500 |
| C | -2.781700 | 0.183000  | -2.856500 |
| C | -1.188902 | 2.878698  | -5.737922 |
| H | -5.633400 | -0.389400 | -4.137600 |
| H | -3.745600 | -1.818700 | -3.115000 |
| H | -5.103200 | 2.054700  | -4.128000 |
| H | -2.119102 | 2.316998  | -5.562522 |
| H | -1.396102 | 3.838098  | -6.247422 |
| H | -0.513602 | 2.295598  | -6.395322 |
| O | -1.515372 | 3.828084  | -9.642561 |
| H | -0.614072 | 3.745266  | -9.962561 |
| O | -2.058489 | -1.117360 | -7.717817 |
| H | -2.437417 | -0.295403 | -8.037817 |
| O | -2.878347 | -4.864027 | -5.320364 |
| H | -1.977047 | -4.946845 | -5.640364 |
| O | 1.379887  | 0.062627  | 2.590676  |
| H | 2.281187  | -0.020191 | 2.270676  |
| O | 3.301311  | 6.081125  | 2.185662  |
| H | 4.202611  | 5.998308  | 1.865662  |
| H | 2.922384  | 6.903083  | 1.865662  |
| O | 8.115201  | 4.422624  | -4.384505 |
| H | 7.736274  | 5.244581  | -4.704505 |
| H | -2.058489 | -1.117360 | -6.757817 |
| H | -3.400719 | -5.603167 | -5.640364 |
| H | 0.857515  | -0.676512 | 2.270676  |
| H | -2.037744 | 3.088944  | -9.962561 |
| H | 8.115201  | 4.422624  | -3.424505 |
